# Supplementary material for: Informing Efforts to Develop Nitroreductase for Amine Production
Source: PubMed Central journal article supplement (PMC6017928; doi:10.3390/molecules23020211), 2018-01-24
Supplement: molecules-23-00211-s001.pdf [file molecules-23-00211-s001.pdf]

1 Supplemental Material for "

## 2 Informing Efforts to Develop Nitroreductase for 3 Amine Production

4 Anne-Frances Miller <sup>1,\*,#</sup>, Jonathan T. Park <sup>2,#</sup>, Kyle L. Ferguson <sup>3</sup>, Warintra Pitsawong <sup>1</sup> and  
5 Andreas S. Bommarius <sup>2,3,\*</sup>

6 <sup>1</sup> Department of Chemistry, University of Kentucky, Lexington, KY, USA; afmill3r2@gmail.com

7 <sup>2</sup> School of Chemical and Biomolecular Engineering, Georgia Institute of Technology, Atlanta, GA, USA

8 <sup>3</sup> School of Chemistry and Biochemistry, Georgia Institute of Technology, Atlanta, GA, USA

9 \* Correspondence: afmill3r2@gmail.com or ;andreas.bommarius@chbe.gatech.edu Tel.: +1-859-257-9349

10

11 Present addresses:

12 J. T. Park: Janssen Pharmaceutical Companies of Johnson & Johnson, Malvern, PA

13 K. L. Ferguson: Dept. of Chemistry, Univ. of Michigan, Ann Arbor, MI.

14 W. Pitsawong: Dept. Biochemistry, Brandeis University Waltham, MA.

15

16 Academic Editor: W. Van Berkel

17 Received: date; Accepted: date; Published: date

### 18 1. Contents

#### 19 1.1. Tables

20 S1. Compounds used to calibrate  $E^\circ$  calculations, with ChemSpider ID numbers and measured  
21  $E^\circ$  values.

22 S2. Substrates used for kinetic analysis, with ChemSpider ID numbers and Hammett *para*  
23 constants ( $\sigma$ ).

24 S3. Surface area (per monomer) buried in dimer interface.

25 S4. List of the pdb files and amino acid sequences used in the Figures and the sequence  
26 alignment

#### 27 1.2. Figures

28 S1. Sequence similarity network of the different NR subgroups with ours colored and  
29 subgroups containing amine producers identified.

30 S2. Calibration of calculated  $E^\circ$  values vs. experimental values.

31 S3. Dependence of amine formation on molecular volume and calculated  $E^\circ$  or (b) on \*\* and  
32 calculated  $E^\circ$ .

33 S4. Comparison of *StNfsB* vs. *MsPnbA* via dependence of rates on Hammett *para* coefficient,  
34 showing unscaled data and experimental errors.

35 S5. Visualization of emergence of major subgroups from process of sequential identification of  
36 distinguishing elements of structure.

37 S6. Position numbering for flavin and nicotinamide ring of NADH.

38 S7. Comparison of the shapes and sizes of binding sites provided by NRs representing each of  
39 the four groups.

40 S8. Maps onto the structure of amino acid conservation within and between the subgroups.

41 S9. Alignment of the crystallographic sequences showing amine producers.

42

43

44 **2. Tables**

45 2.1. Table S1. Compounds used to calibrate  $E^\circ$  calculations, and resulting calibrated calculated  $E^\circ$   
 46 values, with ChemSpider ID numbers and measured  $E^\circ$  values.<sup>1</sup>

| Calibration Compound                  | ChemSpider <sup>2</sup> | Uncalibrated<br>Computed $E^\circ$ <sup>3</sup> | Measured $E^\circ$ <sup>1</sup><br>(mV vs. NHE) | Calculated $E^\circ_c$<br><sup>4</sup> (Calibrated) |
|---------------------------------------|-------------------------|-------------------------------------------------|-------------------------------------------------|-----------------------------------------------------|
| nitrobenzene                          | 7138                    | -486                                            | -486                                            | -483                                                |
| 4-chloronitrobenzene                  | 21106020                | -231                                            | -450                                            | -428                                                |
| 4-nitroacetophenone                   | 21106581                | 81                                              | -356                                            | -361                                                |
| trinitrotoluene                       | 8073                    | 561                                             | -253                                            | -259                                                |
| 3-methyl nitrobenzene                 | 21106146                | -556                                            | -475                                            | -498                                                |
| 4-methyl nitrobenzene                 | 13863774                | -649                                            | -500                                            | -518                                                |
| 3-chloronitrobenzene                  | 21106013                | -188                                            | -405                                            | -419                                                |
| 1,4-dinitrobenzene                    | 7211                    | 551                                             | -257                                            | -261                                                |
| 2,4-dinitrotoluene                    | 8150                    | 41                                              | -397                                            | -370                                                |
| 3-nitroacetophenone                   | 21106145                | -185                                            | -437                                            | -419                                                |
| <b>Experimental Compound</b>          |                         |                                                 |                                                 |                                                     |
| 7 3-nitrofurazone                     | 4566720                 |                                                 | -270 <sup>5</sup>                               | -349                                                |
| <b>Experimental Compound</b>          |                         | <b><math>\pi</math> system (# atoms)</b>        | <b>Log(P)</b>                                   |                                                     |
| 1 nitrobenzene                        | 7138                    | 9                                               | 0.32                                            | -483                                                |
| 3 4-nitrobenzene<br>sulfonamide       | 21360                   | 12                                              | -1.17                                           | -342                                                |
| 4 3-trifluoromethyl<br>nitrobenzene   | 7108                    | 9                                               | 1.24                                            | -392                                                |
| 5 3-nitrophthalimide                  | 11286                   | 14                                              | -0.96                                           | -334                                                |
| 6 1-nitronaphthalene                  | 6588                    | 13                                              | 1.32                                            | -427                                                |
| 7 3-nitrofurazone                     | 4566720                 | 14                                              | -2.62                                           | -349                                                |
| 8 4-nitro-1,8-naphthalic<br>anhydride | 73216                   | 18                                              | 0.72                                            | -170                                                |
| 9 BTZ043                              | 24747357                | 15                                              | 2.01                                            | -259 <sup>6</sup>                                   |
| 10 1,3-dinitrobenzene                 | 7172                    | 12                                              | -1.39                                           | -339                                                |
| 12 2,4,6-trinitrotoluene              | 8073                    | 15                                              | -2.61                                           | -259                                                |
| 13<br>3,5-dinitrobenzotrifluoride     | 109682                  | 12                                              | -0.47                                           |                                                     |

47 <sup>1</sup> Measured values were obtained from [1, 2]. Plots are provided as Supplemental Figure S2.

48 <sup>2</sup>Information and links on each compound can be retrieved by entering the ChemSpider number as the  
 49 basis of a search at <http://www.chemspider.com/Default.aspx>

50 <sup>3</sup> *Ab-initio* computations were used to produce 1-electron *relative*  $E^\circ$ s using the functional  $\omega$ B97X-D and  
 51 the basis set 6-311+G\*\* as described in methods.

52 <sup>4</sup> Values calibrated to experiment using the linear dependence in Supplemental Figure S2(a): Calibrated =  
53 (Computed + 379)\*4.667.

54 <sup>5</sup> The measured  $E^\circ$  for 3-nitrofurazone at 7.45, which corresponds to  $\sim\text{NO}_2 + 2e^- + 2\text{H}^+ \rightarrow \sim\text{NO}_2 + \text{H}_2\text{O}$  [3].

55 <sup>6</sup> Computations of  $E^\circ$  retained the full aromatic system and attached amine but replaced the  
56 aliphatic extension with two Hs.

57

58 2.2. Table S2. Substrates used for kinetic analysis, with ChemSpider ID numbers and Hammett  
59 *para* constants ( $\sigma$ ). Plots are provided as Supplemental Figure S4.

60

| Compound                          | Chem-<br>Spider <sup>1</sup> | Hammett<br>$\sigma$ para 2 | StNfsB                          |                                                       | MsPnbA                          |                                                       |
|-----------------------------------|------------------------------|----------------------------|---------------------------------|-------------------------------------------------------|---------------------------------|-------------------------------------------------------|
|                                   |                              |                            | $k_{cat}$<br>(s <sup>-1</sup> ) | $k_{cat}/K_M$<br>(s <sup>-1</sup> .mM <sup>-1</sup> ) | $k_{cat}$<br>(s <sup>-1</sup> ) | $k_{cat}/K_m$<br>(s <sup>-1</sup> .mM <sup>-1</sup> ) |
| nitrobenzene                      | 7138                         | 0                          | -                               | 1.7 ± 0.1                                             | 3.4<br>± 0.4                    | 1.2 ± 0.3                                             |
| 4-nitrobenzoate                   | 3620348                      | 0                          | 5.8 ± 0.3                       | 5.1 ± 0.6                                             | -                               | -                                                     |
| 4-chloronitrobenzene              | 21106020                     | 0.227                      | -                               | 5.2 ± 0.2                                             | 4.5<br>± 0.5                    | 11 ± 4                                                |
| methyl-4-nitrobenzoate            | 11586                        | 0.45                       | -                               | 84.5<br>± 6.8                                         | 9.0<br>± 0.3                    | 75 ± 7                                                |
| 4-nitroacetophenone               | 21106581                     | 0.5                        | 166 ± 25                        | 167 ± 54                                              | -                               | -                                                     |
| 4-nitrobenzenesulfonamide         | 21360                        | 0.6                        | 182 ± 11                        | 108<br>± 20                                           | 17.2<br>± 0.9                   | 91 ± 13                                               |
| 4-nitrobenzotrile                 | 11593                        | 0.66                       | 290<br>± 13                     | 238 ± 22                                              | 16.0<br>± 1.0                   | 111 ± 22                                              |
| methyl<br>4-nitrobenzenesulfonate | 21173                        | 0.9                        | 275<br>± 22                     | 373 ± 90                                              | 19.1<br>± 0.8                   | 165 ± 18                                              |

61 <sup>1</sup> Information and links on each compound can be retrieved by entering the ChemSpider number as  
62 the basis of a search at <http://www.chemspider.com/Default.aspx>

63 <sup>2</sup> [4]

64

65

## 66 2.3. Table S3. Surface area (per monomer) buried in dimer interface.

| Subgroup | Instance (PDB ID) | Buried Area ( $\text{\AA}^2$ ) <sup>1</sup> | Statistics ( $\text{\AA}^2$ ) |
|----------|-------------------|---------------------------------------------|-------------------------------|
| NfsB     | 5J8D              | 4907, 5225                                  | Avg = <b>4600</b> $\pm$ 400   |
|          | 3HZN              | 4137                                        |                               |
|          | 1YKI              | 4681, 4849                                  |                               |
|          | 1VFR              | 4135                                        |                               |
|          | 3OF4              | 4321                                        |                               |
|          | 2HAY              | 4708                                        |                               |
| NfsA     | 1F5V              | 5751                                        | Avg = <b>5500</b> $\pm$ 300   |
|          | 2BKJ              | 4892                                        |                               |
|          | 3N2S              | 5599, 5593                                  |                               |
|          | 3EOF              | 5787                                        |                               |
| PnbA     | 2WZW              | 5014                                        | Avg = <b>5080</b> $\pm$ 70    |
|          | 3GR3              | 5146                                        |                               |
| Frm2     | 2IFA              | 4050, 3957, 3806                            | Avg = <b>3900</b> $\pm$ 100   |
| HUB      | 3E39              | 4168                                        | Avg = <b>4200</b> $\pm$ 100   |
|          | 3E10              | 4372                                        |                               |
|          | 4DN2              | 4172                                        |                               |

67 <sup>1</sup> Average of areas buried of each of two participating monomers, multiple values correspond  
68 to area buried in AB dimer, CD dimer (if present), EF dimer (if present). Calculated in Chimera [5].

69  
70

71 2.4. Table S4. List of the pdb files and amino acid sequences used in the Figures and the sequence  
72 alignment in Figure S9.

73

| Accession code <sup>a</sup><br>(ID in MSA) | Species source and annotated name                                                                                                        | Subgroup, Amine<br>production and ref. |
|--------------------------------------------|------------------------------------------------------------------------------------------------------------------------------------------|----------------------------------------|
| Cons_NfsB                                  | NONE<br>consensus sequence for NfsB from SFLD <sup>b</sup>                                                                               |                                        |
| 5J8D<br>Ent_5J8D                           | <i>Enterobacter cloacae</i> NR UniProtKB AC: <a href="#">Q01234</a>                                                                      | NfsB                                   |
| 1YKI<br>Ecoli_1YKI                         | <i>Escherichia coli</i> NfnB UniProtKB AC: <a href="#">P38489</a>                                                                        | NfsB                                   |
| 1VFR<br>Vfisch_1VFR                        | <i>Vibrio fischeri</i> major NAD(P):FMN oxidoreductase<br>UniProtKB AC: <a href="#">P46072</a>                                           | NfsB                                   |
| 3QDL<br>Helicobac_3QDL                     | <i>Helicobacter pylori</i> RdxA UniProtKB AC: <a href="#">Q25608</a>                                                                     | NfsB                                   |
| 3OF4<br>Idiomar_3OF4                       | <i>Idiomarina loihiensis</i> L2TR<br>Nitroreductase/ dihydropteridine reductase<br>UniProtKB AC: <a href="#">Q5R179</a>                  | NfsB                                   |
| 3HZN<br>Styph_3HZN                         | <b><i>Salmonella typhinurium dihydropteridine reductase</i></b><br><b>UniProtKB AC: <a href="#">P15888</a></b>                           | <b>NfsB AMINE (this<br/>work)</b>      |
| 2HAY<br>Spyo_2HAY                          | <i>Streptococcus pyogenes</i> M1 GAS Putative<br>NAD(P)H-Flavin Oxidoreductase UniProtKB AC:<br><a href="#">Q9A120</a>                   | NfsB                                   |
| 3BEM<br>Bsubt_3BEM                         | <i>Bacillus subtilis</i> putative nitroreductase YdfN<br>(2632848) UniProtKB AC: <a href="#">P96692</a>                                  | MhqN                                   |
| 4QLX<br>Lplant_4QLX                        | <i>Lactobacillus plantarum</i> enone reductase UniProtKB<br>AC: <a href="#">U6C5W9</a>                                                   | MhqN                                   |
| 3GBH<br>Sepider_3GBH                       | <i>Staphylococcus epidermidis</i> ATCC 12228 putative<br>NAD(P)H:FMN oxidoreductase (SE1966) UniProtKB<br>AC: <a href="#">A0A0H2VHN8</a> | MhqN                                   |
| 3GE6<br>Esibir_3GE6                        | <i>Exiguobacterium sibiricum</i> 255-15 putative<br>nitroreductase EXIG_2970 UniProtKB AC: <a href="#">B1YG32</a>                        | MhqN                                   |
| AAP09971<br>AMINE_Bcer3024                 | <i>Bacillus cereus</i> ATCC 14579<br>NAD(P)H nitroreductase called BC_3024 and<br>YdgI_Bc                                                | MhqN, AMINE<br>inferred [6]            |
| 3GAG<br>Smutants_3GAG                      | <i>Streptococcus mutans</i> nitroreductase-like protein<br>(smu.346) UniProtKB AC: <a href="#">Q8D VW4</a>                               | MhqN                                   |
| 2B67<br>Spneum_2B67                        | <i>Streptococcus pneumoniae</i> TIGR4 nitroreductase family<br>protein UniProtKB AC: <a href="#">A0A0H2UP38</a>                          | MhqN                                   |
| Cons_NfsA                                  | NONE                                                                                                                                     |                                        |

|                                 |                                                                                                           |                             |
|---------------------------------|-----------------------------------------------------------------------------------------------------------|-----------------------------|
|                                 | consensus sequence for NfsA from SFLD                                                                     |                             |
| 1F5V<br>Ecoli_1F5V              | <i>Escherichia coli</i> NfsA<br>UniProtKB AC: <a href="#">P17117</a>                                      | NfsA                        |
| 2BKJ<br>Vharv_2BKJ              | <i>Vibrio harveyi</i> Flavin reductase<br>UniProtKB AC: <a href="#">Q56691</a>                            | NfsA                        |
| 3N2S<br>Bsubt_3N2S              | <i>Bacillus subtilis</i><br>NfrA1 nitroreductase<br>UniProtKB AC: <a href="#">P39605</a>                  | NfsA AMINE [7]              |
| 3EOF<br>Bfrag_3EOF              | <i>Bacteroides fragilis</i><br>Oxidoreductase (YP_213212.1)<br>UniProtKB AC: <a href="#">Q5L9C9</a>       | NfsA                        |
| KXV33494<br>AMINE_Gox0834       | <i>Gluconobacter oxydans</i> Nitroreductase Gox0834                                                       | NfsA AMINE [8]              |
| AAP08598<br>AMINE_Bcer1619      | <i>Bacillus cereus</i> ATCC 14579<br>Oxygen-insensitive NADPH nitroreductase called<br>BC_1619 or YfkO_Bc | NfsA, AMINE<br>inferred [6] |
| 010964037<br>AMINE_CaceNit<br>A | <i>Clostridium acetobutylicum</i> 824<br>NitA WP_010964037 NADPH-dependent<br>oxidoreductase              | NfsA AMINE [9]              |
| Cons_PnbA                       | NONE<br>consensus sequence for PnbA from SFLD                                                             |                             |
| 2WZW<br>AMINE_Msmg_2<br>WZW     | <i>Mycobacterium smegmatis</i><br>Nitroreductase NfnB<br>UniProtKB AC: <a href="#">A0R6D0</a>             | PnbA, AMINE [10]            |
| 3GR3<br>Bhen_3GR3               | <i>Bartonella henselae</i> str. houston-1<br>PnbA<br>UniProtKB AC: <a href="#">A0A0H3M323</a>             | PnbA                        |
| WP_031019703.1<br>Strep         | <i>Streptomyces</i> sp. NRRL WC-3795<br>Nitroreductase                                                    | PnbA                        |
| WP_055507769.1<br>Saur          | <i>Streptomyces aurantiacus</i><br>Oxidoreductase                                                         | PnbA                        |
| WP_080719519.1<br>Coryn         | <i>Corynebacterium jeikeium</i><br>Nitroreductase                                                         | PnbA                        |
| WP_014983339.1<br>Nocar         | <i>Nocardia brasiliensis</i><br>Oxidoreductase                                                            | PnbA                        |
| WP_043519713.1<br>Kpneu         | <i>Klebsiella pneumoniae</i><br>Nitroreductase                                                            | PnbA                        |
| WP_057084594.1<br>Dicke         | <i>Dickeya solani</i><br>Nitroreductase                                                                   | PnbA                        |
| WP_076001261.1<br>Halio         | <i>Halioglobus pacificus</i><br>Nitroreductase                                                            | PnbA                        |

|                                    |                                                                                                                    |               |
|------------------------------------|--------------------------------------------------------------------------------------------------------------------|---------------|
| KPQ07647.1<br>Rhodo                | <i>Rhodobacteraceae bacterium</i> HLUCCA12<br>Nitroreductase                                                       | PnbA          |
| ONF96818.1<br>Sphin                | <i>Sphingomonas</i> sp. G39<br>Coenzyme F420:L-glutamate ligase                                                    | PnbA          |
| WP_014992242.1<br>Actino           | <i>Actinobacillus suis</i><br>Nitroreductase                                                                       | PnbA          |
| Cons_Frm2                          | NONE<br>consensus sequence for Frm2 from SFLD                                                                      |               |
| 2IFA<br>Smut_2IFA                  | <i>Streptococcus mutans</i><br>Putative nitroreductase<br>UniProtKB AC: <a href="#">Q8DW21</a>                     | Frm2          |
| 4URP<br>Scere_4URP                 | <i>Saccharomyces cerevisiae</i><br>Nitroreductase<br>UniProtKB AC: <a href="#">P37261</a>                          | Frm2          |
| 2WQF<br>Llact_2WQF                 | <i>Lactococcus lactis</i><br>Nitroreductase CinD<br>UniProtKB AC: <a href="#">Q9CED0</a>                           | Frm2          |
| 1YWQ<br>Bcer_1YWQ                  | <i>Bacillus cereus</i> ATCC 14579<br>Nitroreductase family member<br>UniProtKB AC: <a href="#">Q81EW9</a>          | Frm2          |
| Cons_HUB                           | NONE<br>consensus sequence for HUB from SFLD                                                                       |               |
| 3E39<br>Desulf_3E39                | <i>Desulfovibrio desulfuricans</i> putative nitroreductase<br>dde_0787<br>UniProtKB AC: <a href="#">Q314Q8</a>     | HUB           |
| 3E10<br>Cace_3E10                  | <i>Clostridium acetobutylicum</i> putative NADH oxidase<br>NP_348178.1<br>UniProtKB AC: <a href="#">Q97IT9</a>     | HUB           |
| WP_010966820<br>AMINE_CaceNit<br>B | <i>Clostridium acetobutylicum</i><br>NitB nitroreductase                                                           | HUB AMINE [9] |
| 3KWK<br>Bthet_3KWK                 | <i>Bacteroides thetaiotaomicron</i> putative nitroreductase<br>NP_809094.1<br>UniProtKB AC: <a href="#">Q8ABC9</a> | HUB           |
| 3GE5<br>Pging_3GE5                 | <i>Porphyromonas gingivalis</i> w83<br>Putative NAD(P)H:FMN oxidoreductase<br>UniProtKB AC: <a href="#">Q7MX99</a> | HUB           |
| 3G14<br>Cnov_3G14                  | <i>Clostridium novyi</i> NT Nitroreductase family protein<br>YP_877874.1<br>UniProtKB AC: <a href="#">A0PZS2</a>   | HUB           |
| 4DN2                               | <i>Geobacter metallireducens</i> GS-15 putative                                                                    | HUB           |



|                         |                                                                                                                                   |           |
|-------------------------|-----------------------------------------------------------------------------------------------------------------------------------|-----------|
| Gmetal_4DN2             | nitroreductase<br>UniProtKB AC: <a href="#">Q39RS1</a>                                                                            |           |
| 3GFA<br>Cdiff_3GFA      | <i>Clostridium difficile</i> 630 putative nitroreductase<br>YP_001089721.1<br>UniProtKB AC: <a href="#">Q17ZU8</a>                | HUB       |
| Tther_1NOX              | <i>Thermus thermophilus</i> NADH oxidase<br>UniProtKB AC: <a href="#">Q60049</a>                                                  | HUB       |
| 3EO8<br>Cdiff_3EO8      | <i>Clostridium difficile</i> 630<br>BluB-like flavoprotein YP_001089088<br>UniProtKB AC: <a href="#">Q182R2</a>                   | HUB       |
| Mtub_4XOM<br>Mtubr_4XOM | <i>Mycobacterium tuberculosis</i> C-terminal domain of<br>CoenzymeF420:L-glutamate ligase<br>UniProtKB AC: <a href="#">P9WP79</a> | FbiB      |
| 4EO3<br>Tmar_4EO3       | <i>Thermotoga maritima</i><br>Peroxireductase nitroreductase fusion enzyme.<br>UniProtKB AC: <a href="#">Q9WYL7</a>               | TdsD      |
| 2FRE<br>Agro_2FRE       | <i>Agrobacterium tumefaciens</i> (fabrum)<br>Oxidoreductase<br>UniProtKB AC: <a href="#">A9CKT4</a>                               | TdsD      |
| AFW02496<br>Gox         | <i>Gluconobacter oxydans</i> H24<br>Nitroreductase                                                                                | TdsD      |
| 3GB5<br>Mmus_3GB5       | <i>Mus musculus</i> iodotyrosine deiodinase IYD<br>UniProtKB AC: <a href="#">Q9DCX8</a>                                           | Iyd       |
| 4TTC<br>Hsap_4TTC       | <i>Homo sapiens</i> iodotyrosine deiodinase IYD<br>UniProtKB AC: <a href="#">Q6PHW0</a>                                           | Iyd       |
| 3EK3<br>Bfrag_3EK3      | <i>Bacteroides fragilis</i> NCTC 9343 Nitroreductase<br>YP_211706.1<br>UniProtKB AC: <a href="#">Q5LDN3</a>                       | Unknown 2 |
| 3PXV<br>Dhafn_3PXV      | <i>Desulfitobacterium hafniense</i> DCB-2 Nitroreductase<br>UniProtKB AC: <a href="#">B8FRE0</a>                                  | Unknown 2 |
| 2ISJ<br>Smel_2ISJ       | <i>Sinorhizobium meliloti</i> BluB<br>Flavin conversion to 5,6-dimethylbenzimidazole.<br>UniProtKB AC: <a href="#">Q92PC8</a>     | BluB      |
| 3K6H<br>Agro_3K6H       | <i>Agrobacterium tumefaciens</i> Str. C58 (fabrum)<br>Nitroreductase UniProtKB AC: <a href="#">A9CIP6</a>                         | Unknown 1 |

74 <sup>1</sup> PDB IDs are provided if applicable. For sequences not associated with a structure the NCBI  
75 accession number is provided and in parenthesis the abbreviation used in the Multiple Sequence  
76 Alignment. Accession codes can be associated with further information by using them as the basis  
77 for a search at <https://www.ncbi.nlm.nih.gov/home/proteins/> courtesy of the National Center for  
78 Biotechnology Information, U.S. National Library of Medicine 8600 Rockville Pike, Bethesda MD,  
79 20894 USA

80           <sup>2</sup> Subgroups are those of Akiva/Copp [11]. Enzymes for which we found literature reports of  
81 amine production are so indicated with the reference.

82           <sup>3</sup>SFLD is the Structure-Function Linkage Database [12].

83

84

## 85 3. Figures

86

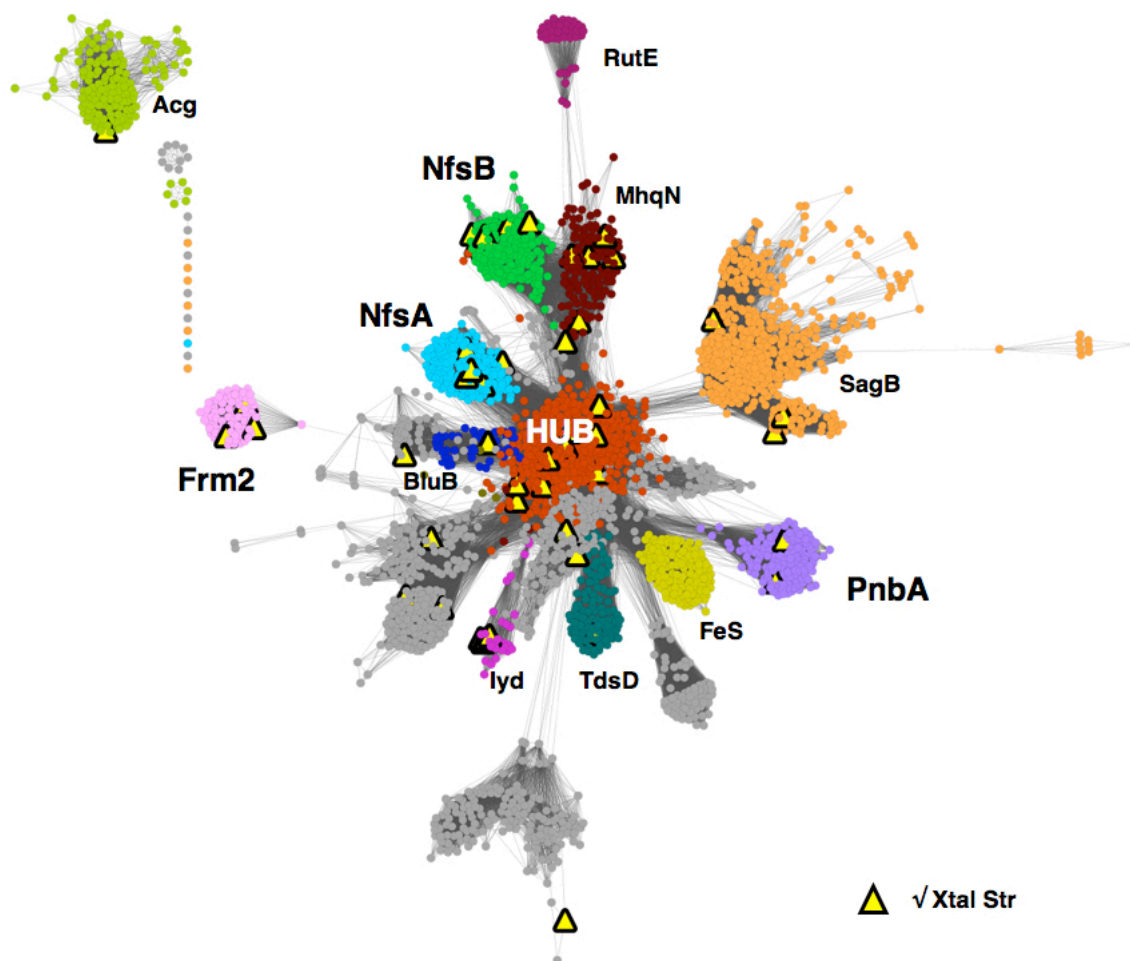

87

88 3.1. [Figure S1](#). Sequence similarity network of the different subgroups of the nitroreductase  
 89 superfamily coloured similarly to Akiva, Copp et al [11] but with unknown subgroups in grey.  
 90 Small differences in the distribution of the subgroups have resulted from the use of a different  
 91 software but the topology of the network is unchanged (compare with Figure 2 of [11]). Each small  
 92 coloured or grey dot is a node of amino acid sequences sharing 50% or higher identity. Any nodes  
 93 sharing homology scoring higher than  $e^{-16}$  with another node is connected to it with a line. Those  
 94 nodes that include a solved crystal structure are depicted as yellow triangles with heavy borders.  
 95 In each subgroup with ours colored and subgroups containing amine producers identified.  
 96 Otherwise each node is coloured according to the subgroup to which it is assigned. The colours  
 97 replicate those of Akiva/Copp except where needed to permit use of the same colours in structural  
 98 figures. Thus rust replaces the red of Akiva/Copp in order to allow CPK to be used (red = oxygen);  
 99 bright blue replaces light teal for NfsA, the pale mauve (PnbA) and rose (Frm2) of Akiva/Copp have  
 100 also been rendered in more saturated colours, to improve structural figures. For the origins of  
 101 subgroup names, see Akiva, Copp et al. [11].

102

103

104

105

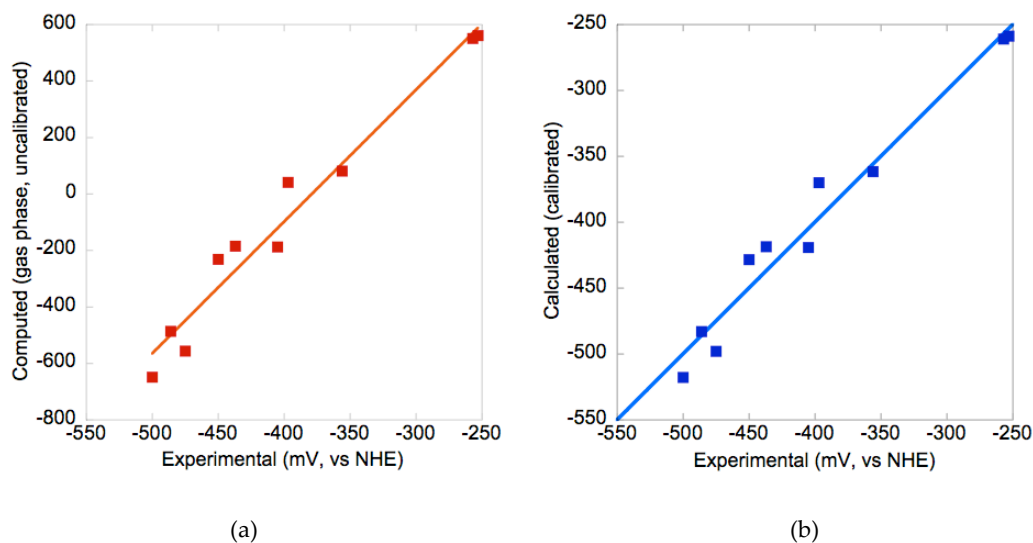

106

107

108

109

110

111

112

113

114

115

116

117

118

119

120

121

122

123

124

125

3.2. **Figure S2.** (a) Calibration of calculated  $E^\circ$  values *vs.* experimental values and (b) resulting correspondence between calibrated calculations and experiment yielding MAD = 14 mV. *Ab-initio* computations were used to produce 1-electron *relative*  $E^\circ$ s using the functional  $\omega$ B97X-D and the basis set 6-311+G\*\* as described in methods. These computed values of  $E^\circ$  show a linear trend *vs.* experimental values with  $R^2 = 0.96$  and  $\text{Comp} = (\text{Exp} + 379) \cdot 4.67$  where 'Comp' is the value from *ab initio* gas-phase calculation in mV. The 379 mV systematic offset and the multiplier of 4.67 both likely arise from our use of gas-phase calculations and a modest level of theory whereas the measured values derive from water (for another example see [1, 13]). Thus we emphasize that the *ab-initio* calculations at our level of theory in gas phase do not themselves yield values that replicate experiment in water. They do however produce a tight and linear correlation with all 10 experimental values that were most pertinent to the class of molecules and reaction under study, and therefore permit estimations of anticipated  $E^\circ$ s where they are not available from experiment. Thus we treated the straight-line correlation as a calibration curve, and applied the calibration to obtain calibrated values  $\text{Cal} = (\text{Comp}/4.67) - 379$  to produce calculated 1-e  $E^\circ$ s that are calibrated against experiment. This compromise has allowed us to apply the method to larger molecules than would have been accessible without access to specialized resources. The success of the calculated results can be assessed by comparing the plot *vs.* experimental data (dark blue squares) with an  $Y=X$  line. The mean absolute deviation (MAD) of the calculated values from the line is 14 mV.

126

127

128

Compounds used are tabulated in Supplemental Table S2 with measured values obtained from [1, 2].

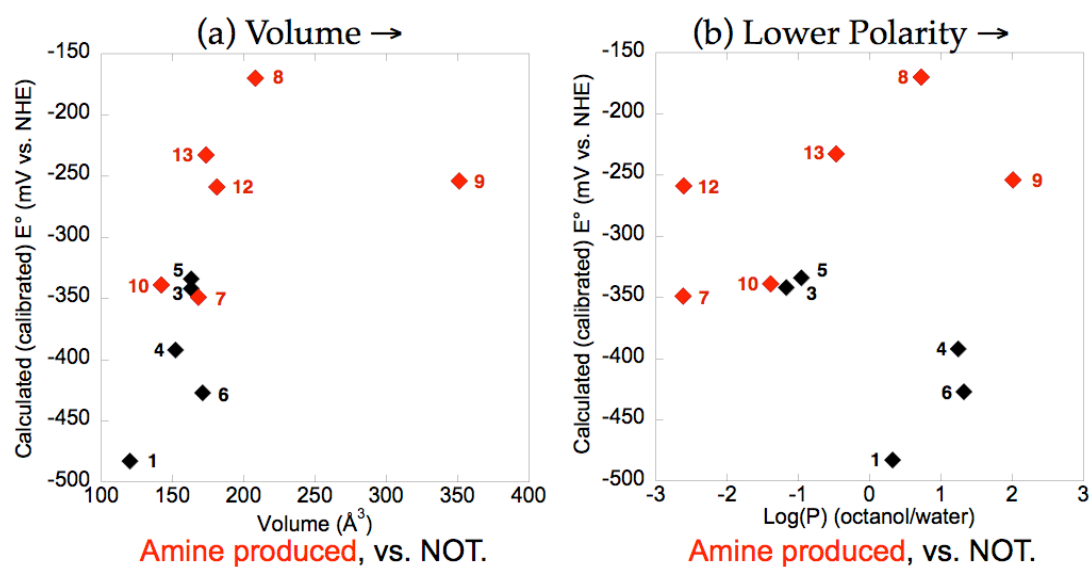

129

130

131

132

133

134

135

136

137

138

3.3. Figure S3. (a) Dependence of amine formation on molecular volume and calculated  $E^\circ$  or (b) on  $\log(P)$  and calculated  $E^\circ$ . Volume and  $\log(P)$  were calculated in Spartan based on CPK atomic volumes and an estimated octanol/water partition coefficient calculated by the method of Ghose and Crippen. While larger molecules (right hand side of panel (a)) seem slightly more prone to conversion to amines, molecular polarity does not appear to correlate with propensity to form amines (b). In both panels the vertical axis is calculated  $E^\circ$ , which correlates with formation of amine product.

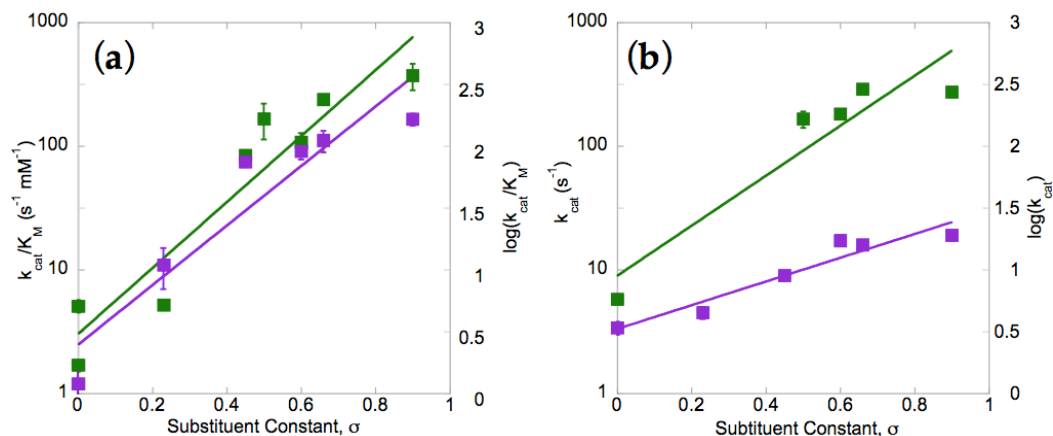

139

140

141

142

143

144

145

146

147

148

149

150

151

152

153

3.4. Figure S4. Plots of enzymatic reaction rates showing the errors evaluated via triplicate measurements for *StNfsB* (green) and *MsPnbA* (purple). Data are plotted with respect to sensitivity to Hammett para constant  $\sigma$  [4]. (a) shows dependence of the second-order rate constant and (b) shows that of the first-order rate constant. (b) here is the same as panel (b) of Figure 3, but is reproduced here to permit direct comparison with panel (a). Note that error bars are shown but rarely exceed the size of the symbol. Note also that these data are not normalized to the rate constant of the unsubstituted parent compound but presented as measured to permit direct comparison between the rates produced by the two different enzymes.  $\text{Log}(k_{\text{cat}}/K_M)$  data are fit with lines, with for *StNfsB* a slope of  $2.7 \pm 0.4$  and an intercept of  $0.5 \pm 0.2$  ( $R^2=0.89$ ), and for *MsPnbA* a slope of  $2.4 \pm 0.4$  and intercept of  $0.4 \pm 0.2$  ( $R^2=0.88$ ).  $\text{Log}(k_{\text{cat}})$  data are fit with lines, with for *StNfsB* a slope of  $2.0 \pm 0.4$  and an intercept of  $0.9 \pm 0.3$  ( $R^2=0.88$ ), and for *MsPnbA* a slope of  $1.0 \pm 0.1$  and intercept of  $0.5 \pm 0.08$  ( $R^2=0.92$ ). Values are tabulated in Supplementary Table S1.

154

155

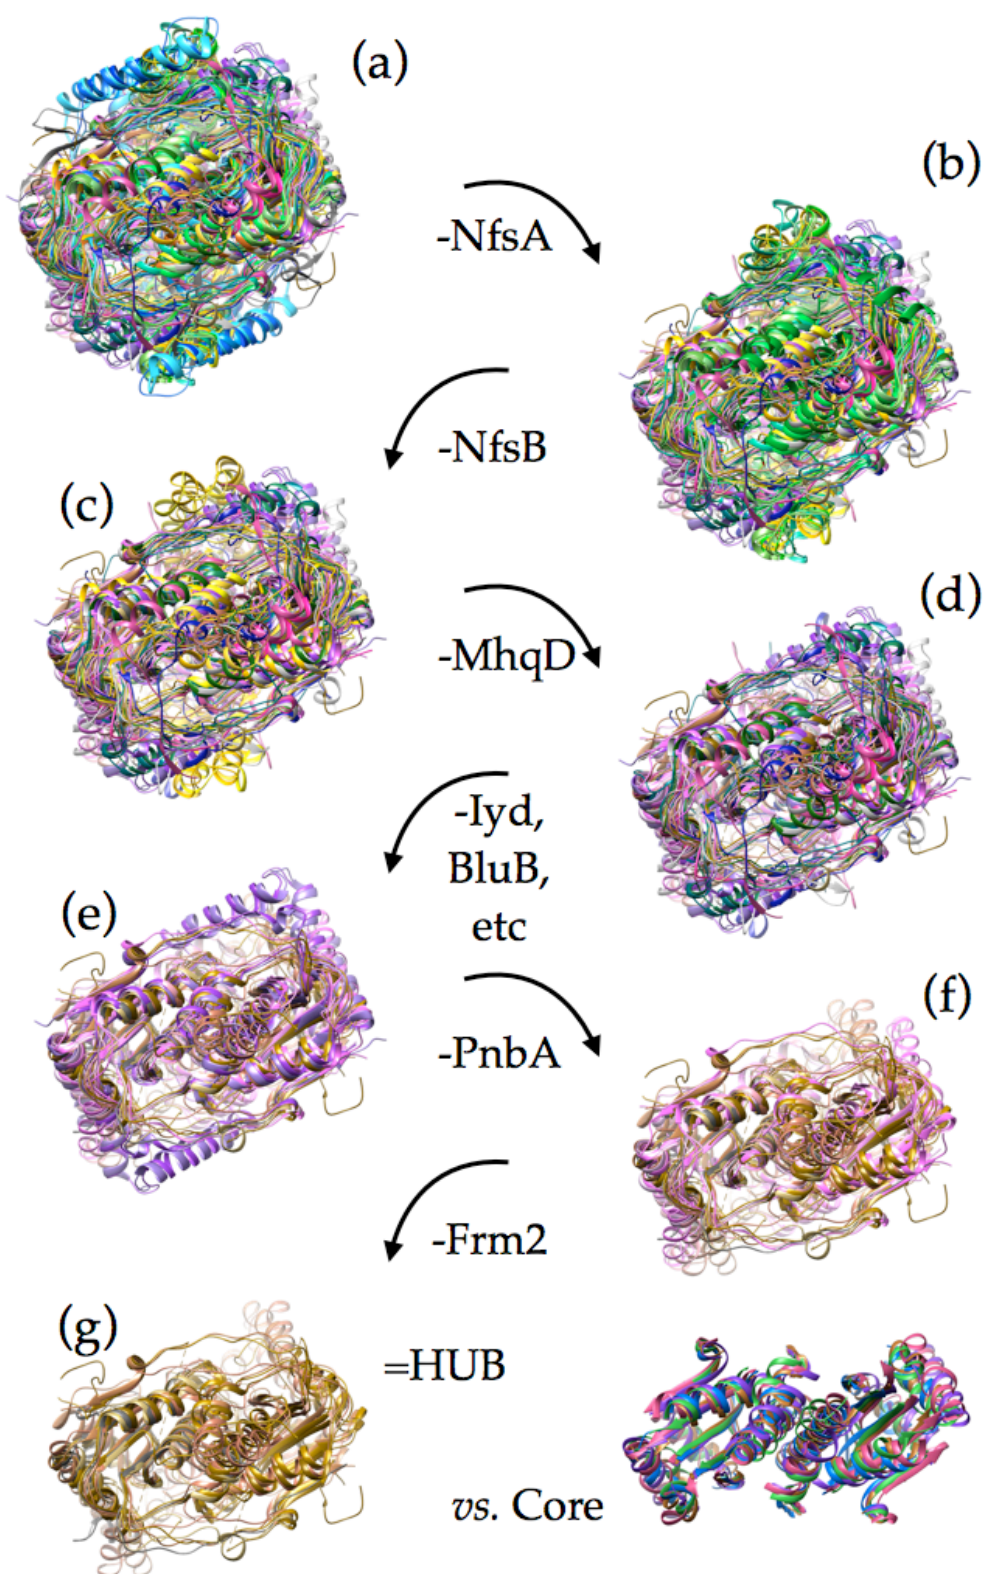

156

157

158

159

160

3.5. [Figure S5](#). View of steps in which successive subgroups can be identified and removed from the remaining large collection of NR-related enzyme structures. Panel A is the overlay of 36 structures shown in the manuscript, in B the NfsA structures have been removed, in C the NfsB structures have additionally been removed, D further lacks the structures of MhqD subgroup

161 members, and so forth. Finally only the structures of HUB subgroup members remain. PDB  
162 accession numbers of all the structures are in Supplementary Table S4.  
163



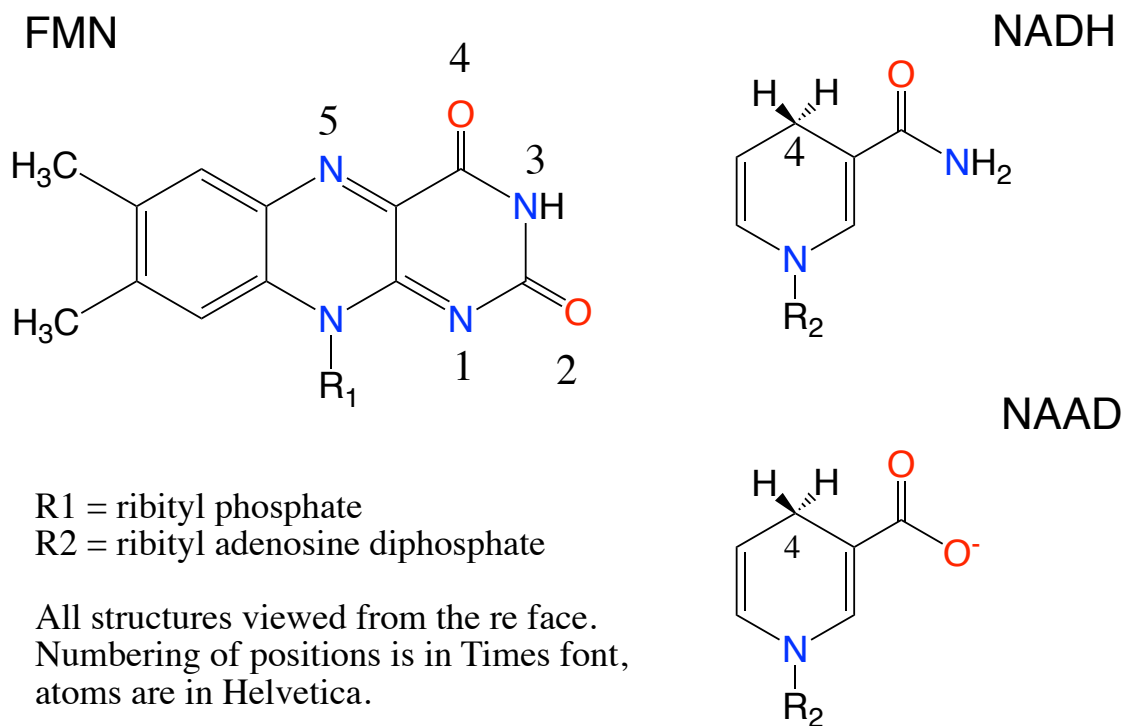

164

165

166

167

168

169

3.6. [Figure S6](#). Position numbering for flavin, nicotinamide ring of NADH and analogous nicotinic acid ring of the nicotinic acid adenine dinucleotide used as a model for NADH in crystallography of *EntNfsB*.

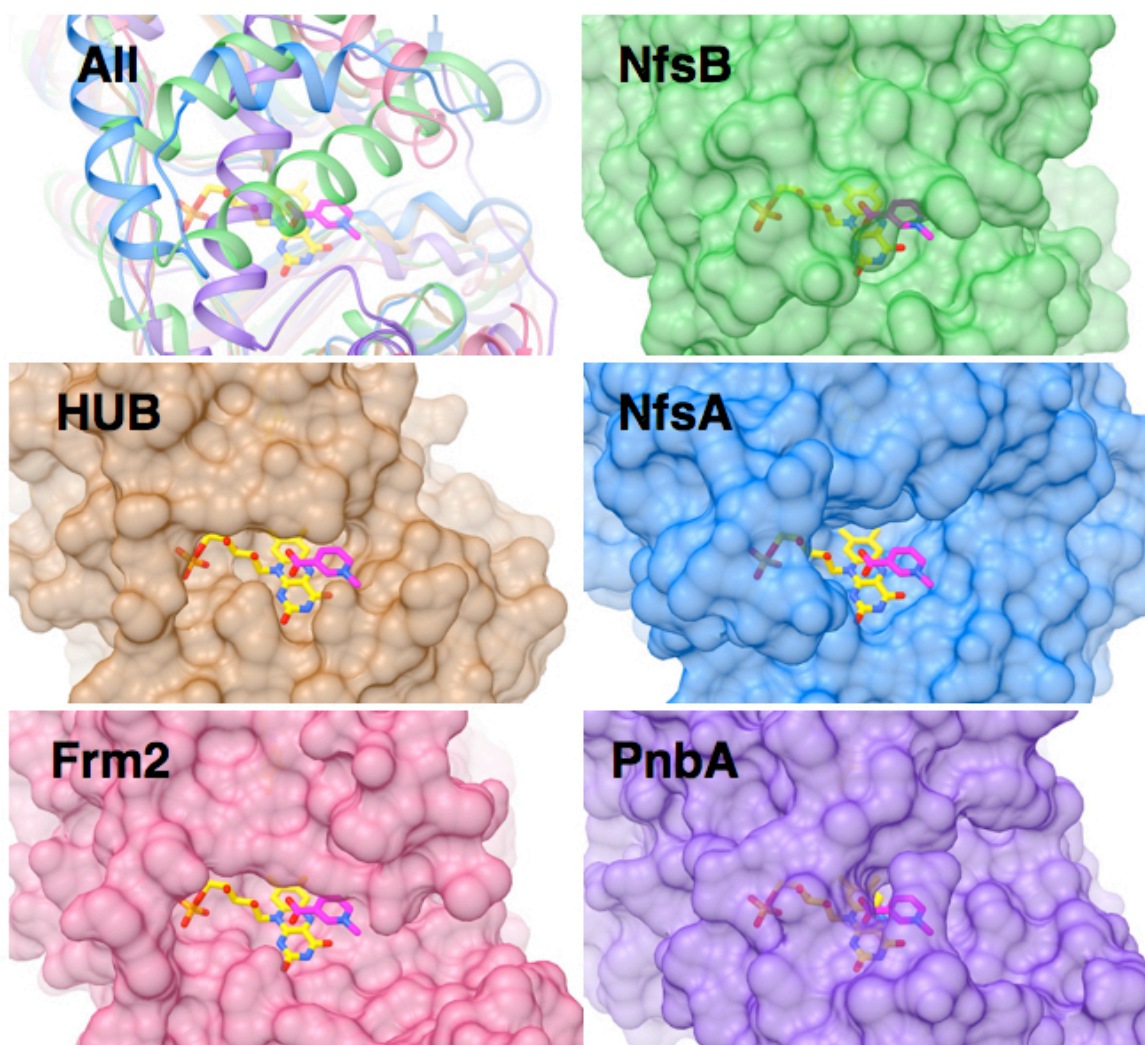

170

171

172

173

174

175

176

177

178

3.7. Figure S7. Comparison of the shapes and sizes of binding sites provided by NRs representing each of the four groups. Overlay of the ribbon structures of *MsPnbA* (purple, 2WZV), *StNfsB* (green, 5J8D), *E. coli NfsA* (blue, 1F5V), *Smut Frm2* (pink, 2IFA), *Desulf HUB* (brown, 3E39). In each case one of the fine structures' surface is shown at 50% transparency, and the ribbons of all structures are shown for reference in the top left panel. The FMN and the nicotinic acid ring of bound NAAD of 5J8D are shown in all cases to provide markers for the active site. NAAD is nicotinic acid adenine dinucleotide, and analog of NADH (Supplemental Figure S6).

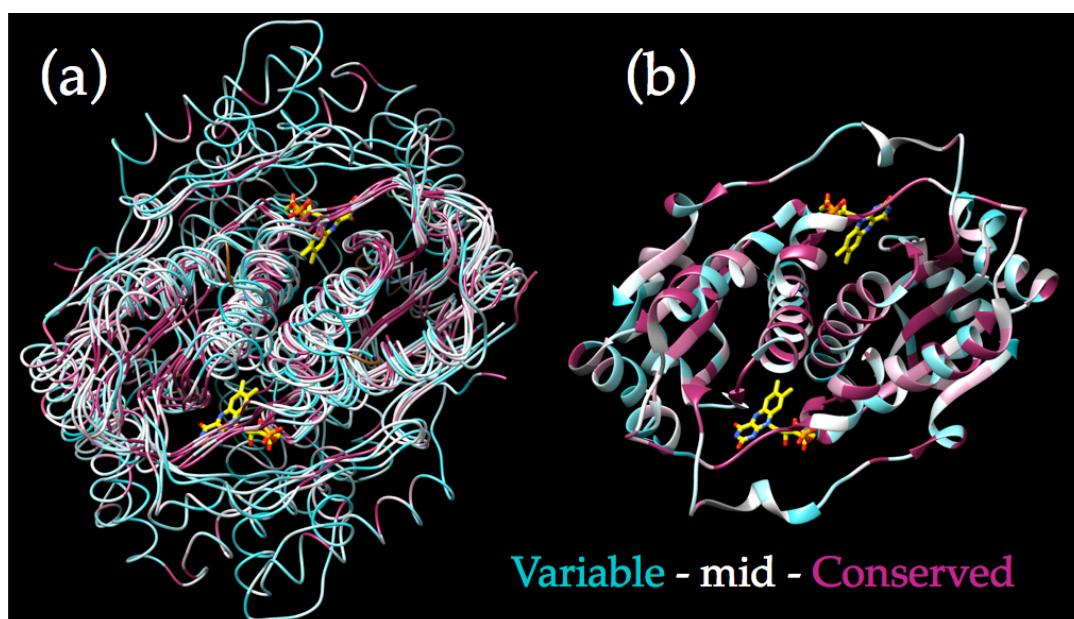

179

180 3.8. Figure S8. Comparison of (a) distribution of conservation within each of the subgroups - each  
181 depicted as a cord, with (b) conservation between subgroups depicted on core sequence only  
182 (ribbons). Subgroups included are NsfA, NsfB, PnbA, Frm2, HUB. Conservation at each residue  
183 was provided from multiple sequence alignment of each subgroup provided by the Structure  
184 Function Linkage Database [12].

185

186

187

188

189 3.9. Figure S9. Following 5 pages:

190 Alignment of the crystallographic and supporting other amino acid sequences showing amine  
191 producers. The representative sequence from each subgroup is labeled on a coloured background  
192 with the theme that has been used throughout: NfsB (Ent\_5J8D, green), NfsA (Ecoli\_1F5V, blue),  
193 Frm2 (Smut\_2IFA, pink), PnbA (AMINE\_Msmg\_2WZW, purple) and HUB (Desulf\_3E39, rust). In  
194 the alignment, secondary structure is enclosed in yellow boxes (helices) and green (beta strands).

195

196

|                  | 1  | 11 | 21 | 31 | 41 | 51 | 61 | 71 |
|------------------|----|----|----|----|----|----|----|----|
| Consensus        | -  | -  | -  | -  | -  | -  | -  | -  |
| Conservation     |    |    |    |    |    |    |    |    |
| Cons_NsfB        | 1  | -  | -  | -  | -  | -  | -  | -  |
| Ent_5J8D         | 1  | -  | -  | -  | -  | -  | -  | -  |
| Ecoli_1YKI       | 1  | -  | -  | -  | -  | -  | -  | -  |
| Vfisch_1VFR      | 1  | -  | -  | -  | -  | -  | -  | -  |
| Helicobac_3QDL   | 1  | -  | -  | -  | -  | -  | -  | -  |
| Idiomar_3OF4     | 1  | -  | -  | -  | -  | -  | -  | -  |
| AMINE_Styph_3HZN | 1  | -  | -  | -  | -  | -  | -  | -  |
| Spyo_2HAY        | 1  | -  | -  | -  | -  | -  | -  | -  |
| Bsubt_3BEM       | 1  | -  | -  | -  | -  | -  | -  | -  |
| Lplant_4QLX      | 1  | -  | -  | -  | -  | -  | -  | -  |
| Sepider_3GBH     | 1  | -  | -  | -  | -  | -  | -  | -  |
| Esibir_3GE6      | 1  | -  | -  | -  | -  | -  | -  | -  |
| AMINE_Bcer3024   | 1  | -  | -  | -  | -  | -  | -  | -  |
| Smutants_3GAG    | 1  | -  | -  | -  | -  | -  | -  | -  |
| Spneum_2B67      | 1  | -  | -  | -  | -  | -  | -  | -  |
| Cons_NfsA        | 1  | -  | -  | -  | -  | -  | -  | -  |
| Ecoli_1F5V       | 1  | -  | -  | -  | -  | -  | -  | -  |
| Vharv_2BKJ       | 1  | -  | -  | -  | -  | -  | -  | -  |
| AMINE_Bsubt_3N2S | 1  | -  | -  | -  | -  | -  | -  | -  |
| Bfrag_3EOF       | 1  | -  | -  | -  | -  | -  | -  | -  |
| AMINE_Gox0834    | 1  | M  | S  | G  | T  | S  | S  | E  |
| AMINE_Bcer1619   | 1  | -  | -  | -  | -  | -  | -  | -  |
| AMINE_CaceNitA   | 1  | -  | -  | -  | -  | -  | -  | -  |
| Cons_PnbA        | 1  | -  | -  | -  | -  | -  | -  | -  |
| AMINE_Msmg_2WZW  | 0  | -  | -  | -  | -  | -  | -  | -  |
| Bhen_3GR3        | 1  | -  | -  | -  | -  | -  | -  | -  |
| Strep            | 1  | -  | -  | -  | -  | -  | -  | -  |
| Saur             | 1  | -  | -  | -  | -  | -  | -  | -  |
| Coryn            | 1  | -  | -  | -  | -  | -  | -  | -  |
| Nocar            | 1  | -  | -  | -  | -  | -  | -  | -  |
| Kpneu            | 1  | -  | -  | -  | -  | -  | -  | -  |
| Dicke            | 1  | -  | -  | -  | -  | -  | -  | -  |
| Halio            | 1  | -  | -  | -  | -  | -  | -  | -  |
| Rhodo            | 1  | -  | -  | -  | -  | -  | -  | -  |
| Sphin            | 1  | -  | -  | -  | -  | -  | -  | -  |
| Actino           | 1  | -  | -  | -  | -  | -  | -  | -  |
| Cons_Frm2        | 1  | -  | -  | -  | -  | -  | -  | -  |
| Smut_2IFA        | 1  | -  | -  | -  | -  | -  | -  | -  |
| Scere_4URP       | 1  | -  | -  | -  | -  | -  | -  | -  |
| Llact_2WQF       | 1  | -  | -  | -  | -  | -  | -  | -  |
| Bcer_1YWQ        | 1  | -  | -  | -  | -  | -  | -  | -  |
| Cons_HUB         | 1  | -  | -  | -  | -  | -  | -  | -  |
| Desulf_3E39      | 0  | -  | -  | -  | -  | -  | -  | -  |
| Cace_3E10        | 1  | -  | -  | -  | -  | -  | -  | -  |
| AMINE_CaceNitB   | 1  | -  | -  | -  | -  | -  | -  | -  |
| Bthet_3KWK       | 1  | -  | -  | -  | -  | -  | -  | -  |
| Pging_3GE5       | 1  | -  | -  | -  | -  | -  | -  | -  |
| Cnov_3G14        | 1  | -  | -  | -  | -  | -  | -  | -  |
| Gmetal_4DN2      | 1  | -  | -  | -  | -  | -  | -  | -  |
| Cdiff_3GFA       | 1  | -  | -  | -  | -  | -  | -  | -  |
| Tther_1NOX       | 1  | -  | -  | -  | -  | -  | -  | -  |
| Cdiff_3EO8       | 1  | -  | -  | -  | -  | -  | -  | -  |
| Mtub_4XOM        | 1  | -  | -  | -  | -  | -  | -  | -  |
| Tmar_4EO3        | 1  | -  | -  | -  | -  | -  | -  | -  |
| Agro_2FRE        | 1  | -  | -  | -  | -  | -  | -  | -  |
| Gox              | 1  | -  | -  | -  | -  | -  | -  | -  |
| Mmus_3GB5        | 28 | W  | Q  | E  | A  | E  | E  | S  |
| Hsap_4TTC        | 34 | W  | Q  | E  | S  | E  | E  | N  |
| Bfrag_3EK3       | 1  | -  | -  | -  | -  | -  | -  | -  |
| Dhafn_3PXV       | 1  | -  | -  | -  | -  | -  | -  | -  |
| Smel_2ISJ        | 1  | -  | -  | -  | -  | -  | -  | -  |
| Agro_3K6H        | 1  | -  | -  | -  | -  | -  | -  | -  |

|                  | 81      | 91                                                                                                                                                                | 101       | 111       | 121       | 131       | 141       | 151       | f - g a -                                                               |
|------------------|---------|-------------------------------------------------------------------------------------------------------------------------------------------------------------------|-----------|-----------|-----------|-----------|-----------|-----------|-------------------------------------------------------------------------|
| Consensus        | v v s g | - - - k - r l a l a l - a a                                                                                                                                       | - - - - - | - - - - - | - - - - - | - - - - - | - - - - - | - - - - - | - - - - f - g a -                                                       |
| Conservation     |         |                                                                                                                                                                   |           |           |           |           |           |           |                                                                         |
| Cons_NsfB        | 50      | v v e n - p e l k e k - l k - - - p a a w -                                                                                                                       | - - - - - | - - - - - | - - - - - | - - - - - | - - - - - | - - - - - | - - - - n q p q i t d a S                                               |
| Ent_5J8D         | 50      | V A S T - E E G K A R V A K S A - A G T Y -                                                                                                                       | - - - - - | - - - - - | - - - - - | - - - - - | - - - - - | - - - - - | - - - - V F N E R K M L D A S                                           |
| Ecoli_1YKI       | 50      | V A S T - E E G K A R V A K S A - A G N Y -                                                                                                                       | - - - - - | - - - - - | - - - - - | - - - - - | - - - - - | - - - - - | - - - - V F N E R K M L D A S                                           |
| Vfisch_1VFR      | 52      | V I E S - D A A K Q R M - H D S - F A N M -                                                                                                                       | - - - - - | - - - - - | - - - - - | - - - - - | - - - - - | - - - - - | - - - - H Q F N Q P H I K A C S                                         |
| Helicobac_3QDL   | 56      | M V T D - K D L K K Q I A - A - - H S Y F -                                                                                                                       | - - - - - | - - - - - | - - - - - | - - - - - | - - - - - | - - - - - | - - - - N E E M I K S A S                                               |
| Idiomar_3OF4     | 50      | V I R N - K G L R E Q L V N - - - H S F -                                                                                                                         | - - - - - | - - - - - | - - - - - | - - - - - | - - - - - | - - - - - | - - - - G Q Q K V A D S S                                               |
| AMINE_Styph_3HZN | 53      | V A S T - E E G K A R V A K S A - A G N Y -                                                                                                                       | - - - - - | - - - - - | - - - - - | - - - - - | - - - - - | - - - - - | - - - - T F N E R K M L D A S                                           |
| Spyo_2HAY        | 58      | V L D N - K P I K E E I - K P - - F A W G -                                                                                                                       | - - - - - | - - - - - | - - - - - | - - - - - | - - - - - | - - - - - | - - - - A Q Y Q L E T A S                                               |
| Bsubt_3BEM       | 51      | T V L D Q D V - K E K L K Q - - A A N G -                                                                                                                         | - - - - - | - - - - - | - - - - - | - - - - - | - - - - - | - - - - - | - - - - Q Y K V V S S S                                                 |
| Lplant_4QLX      | 62      | V V D T P E A - K A K F K Q A V M K F N -                                                                                                                         | - - - - - | - - - - - | - - - - - | - - - - - | - - - - - | - - - - - | - - - - Y P Q V D S A S                                                 |
| Sepider_3GBH     | 58      | V V Q S D E M - K E K V K E - S F G F N -                                                                                                                         | - - - - - | - - - - - | - - - - - | - - - - - | - - - - - | - - - - - | - - - - S R Q L T T S S                                                 |
| Esibir_3GE6      | 57      | V I D S E E G - K A T L A P - L A K F N -                                                                                                                         | - - - - - | - - - - - | - - - - - | - - - - - | - - - - - | - - - - - | - - - - Q V Q V E T S S                                                 |
| AMINE_Bcer3024   | 57      | V I E S D E A - K A T L A P - L A K F N -                                                                                                                         | - - - - - | - - - - - | - - - - - | - - - - - | - - - - - | - - - - - | - - - - Q S Q V E T S S                                                 |
| Smutants_3GAG    | 53      | V V K N K N K - Q E D L K K - L A A L Q -                                                                                                                         | - - - - - | - - - - - | - - - - - | - - - - - | - - - - - | - - - - - | - - - - P Q V A T A S                                                   |
| Spneum_2B67      | 52      | V V R E K - - - N A E L A K L A Y G S N -                                                                                                                         | - - - - - | - - - - - | - - - - - | - - - - - | - - - - - | - - - - - | - - - - F E Q V S S                                                     |
| Cons_NfsA        | 50      | r v t d - - - p e k k a r l a e l a g -                                                                                                                           | - - - - - | - - - - - | - - - - - | - - - - - | - - - - - | - - - - - | - - - - n Q p y v a q a p - -                                           |
| Ecoli_1F5V       | 50      | R I T D - - - K A L R E E L V T L T G -                                                                                                                           | - - - - - | - - - - - | - - - - - | - - - - - | - - - - - | - - - - - | - - - - G Q K H V A Q A A - -                                           |
| Vharv_2BKJ       | 50      | R V T D - - - S E K R N E L A Q F A G -                                                                                                                           | - - - - - | - - - - - | - - - - - | - - - - - | - - - - - | - - - - - | - - - - N Q A Y V E S A A - -                                           |
| AMINE_Bsubt_3N2S | 50      | G V S D - - - P E K K R E L S V L A G -                                                                                                                           | - - - - - | - - - - - | - - - - - | - - - - - | - - - - - | - - - - - | - - - - N Q P Y V E K N G - -                                           |
| Bfrag_3EOF       | 48      | V T R D - - - A E K K E I L S P A H - F -                                                                                                                         | - - - - - | - - - - - | - - - - - | - - - - - | - - - - - | - - - - - | - - - - N Q P M V K E A P - -                                           |
| AMINE_Gox0834    | 76      | A V E N - - - P E T R A R L A E L C G -                                                                                                                           | - - - - - | - - - - - | - - - - - | - - - - - | - - - - - | - - - - - | - - - - N Q K H I E V A P - -                                           |
| AMINE_Bcer1619   | 50      | Y V T D - - - Q D L K I K L A E L S G -                                                                                                                           | - - - - - | - - - - - | - - - - - | - - - - - | - - - - - | - - - - - | - - - - N - R H V D C A - -                                             |
| AMINE_CaceNitA   | 50      | V V R D - - - K K K R E K L A E L V G -                                                                                                                           | - - - - - | - - - - - | - - - - - | - - - - - | - - - - - | - - - - - | - - - - N Q E Y V A K A P - -                                           |
| Cons_PnbA        | 49      | v v t G - - e a l d r l r a a l l e a a a a g e p s p d f p y p r - e y - r g p y r e R r r e v g w q l y g a l G l a r g D k e a r a r q a l r n f r f F g A P   | - - - - - | - - - - - | - - - - - | - - - - - | - - - - - | - - - - - | - - - -                                                                 |
| AMINE_Msmg_2WZW  | 64      | V V S G - - A A R D R L A E A L V T A H A E E R V T V D F P Y R E G L F Q G - V L Q E R R A D F G S R L Y A A L G I A R D Q T D L L Q G Y N T E S L R F Y G A P   | - - - - - | - - - - - | - - - - - | - - - - - | - - - - - | - - - - - | - - - -                                                                 |
| Bhen_3GR3        | 55      | V L T G - - K I L Q K V G Q E L S Q L V L S G I K G E R E Y H Y Y P R Q W R E P Y L S R R R K V G L D L Y K S L G I Q K G D Q E K M L H Q K A K N F L F Y G A P   | - - - - - | - - - - - | - - - - - | - - - - - | - - - - - | - - - - - | - - - -                                                                 |
| Strep            | 54      | I V S G - - A A - - R D A L S K E L L K A Y E D G R D S A D F T G D Y G D G - V Y L E R S Y Q H G A R V Y G A R G I A R S D M E G R N E V I R E N L R F Y D A P   | - - - - - | - - - - - | - - - - - | - - - - - | - - - - - | - - - - - | - - - -                                                                 |
| Saur             | 55      | V A S G - - A A R D N L A E A L V A A H R A G R R T V D F P F S E D T F T P - V H Q H R R A A M G A A L Y G A L G I D R D D H E L R A A Y D V Q S L S F Y G A P   | - - - - - | - - - - - | - - - - - | - - - - - | - - - - - | - - - - - | - - - -                                                                 |
| Coryn            | 49      | V I G G - - Q K L - K D L S A A L I E E F D T N G L N P D F T I D Y G Q G V - H P Q - R S M E L A A K M Y G L L G I A R E D K E A R T E F V R E N L R F F G A P   | - - - - - | - - - - - | - - - - - | - - - - - | - - - - - | - - - - - | - - - -                                                                 |
| Nocar            | 62      | V V S G - - P A R D R L S A A L L T A H T Q K Y L S V D F P Y R D D L Y T D - L H R R R R E D F G E T V Y R A L G I A R D D H P A R E A H S T E S L R F Y G A P   | - - - - - | - - - - - | - - - - - | - - - - - | - - - - - | - - - - - | - - - -                                                                 |
| Kpneu            | 53      | I V S G - - S K K D V L S K A I L A A D D A G Q L T P D F S F G I N D F P G - V Y R E R Y K E Q G A A Y Y Q A I G V K R D D K D L R R E A S R R N L E F F G A P   | - - - - - | - - - - - | - - - - - | - - - - - | - - - - - | - - - - - | - - - -                                                                 |
| Dicke            | 65      | I V S G - - K K L T E L A K I L H E K N N A G E L T P D F T F D M D H F Y G - A Y G E R K N A Q G K A Y Y E A M N I A R E D K E G R H R A V A Y N Y S F F N A P   | - - - - - | - - - - - | - - - - - | - - - - - | - - - - - | - - - - - | - - - -                                                                 |
| Halio            | 54      | V A S G - - D A V E T L R K E M P S R F M Q G E M S L D F P Y D G V Y - E G - V Y K Q R Q H G S A Q A L Y D A A G I A R E D K A R R H E V Q F M E N F T F F G A P | - - - - - | - - - - - | - - - - - | - - - - - | - - - - - | - - - - - | - - - -                                                                 |
| Rhodo            | 50      | V V S R - - A V L R A L G H A M T E A A R S G Q P P A P D V P M I S R Y E G - P F R H R Q I D A A K A L Y G A M G I A R N D H D G R A A A F L R N L D A F G A P   | - - - - - | - - - - - | - - - - - | - - - - - | - - - - - | - - - - - | - - - -                                                                 |
| Sphin            | 61      | V V S G - - E A A E R M R T V L H D A A K S G T K M T P D F P L T G A Y P G - H Y R G R Q I D A A K S L F A A T N V A R D D V P A R T E S F L R N F R F F D A P   | - - - - - | - - - - - | - - - - - | - - - - - | - - - - - | - - - - - | - - - -                                                                 |
| Actino           | 50      | I V S G - - E A L - K R L S D K L V D G F R T G N L A P D F I F D Q H A L T G V Y E D R M R D S Y K R L Y D A F N I L R E D K A G R K S F A E E N A R F Y G A P   | - - - - - | - - - - - | - - - - - | - - - - - | - - - - - | - - - - - | - - - -                                                                 |
| Cons_Frm2        | 53      | v l f g - - e e h d k l w d - i t k e t l r - k i v p a e a f - - - - -                                                                                           | - - - - - | - - - - - | - - - - - | - - - - - | - - - - - | - - - - - | - - - - a a T e e K i d s F k a g -                                     |
| Smut_2IFA        | 52      | V L F G - - Q D S Q D F W N K I A Y S E L E - K V T P A E A F - - - - -                                                                                           | - - - - - | - - - - - | - - - - - | - - - - - | - - - - - | - - - - - | - - - - A G T K A K L E S F A A G -                                     |
| Scere_4URP       | 57      | I I V G - - D T H K R I W D A V A - S A M P - - - T - - - - -                                                                                                     | - - - - - | - - - - - | - - - - - | - - - - - | - - - - - | - - - - - | - - - - A E A K K R P E S C R D E A                                     |
| Llact_2WQF       | 50      | I L T G - - D A Q D K L W D E I V A P E L K - - A A M E A Q G - - - - -                                                                                           | - - - - - | - - - - - | - - - - - | - - - - - | - - - - - | - - - - - | - - - - V P E S A W D N T R A K L D G F K - A A                         |
| Bcer_1YWQ        | 55      | V L M D - - G E H E K F W D - I V K E T L R A R V - P A E N F - - - - -                                                                                           | - - - - - | - - - - - | - - - - - | - - - - - | - - - - - | - - - - - | - - - - E A T V E R L K G F H A G -                                     |
| Cons_HUB         | 49      | v v t - - - d - k - e l l - e - - k l - - - a - - - - - k p - - - - -                                                                                             | - - - - - | - - - - - | - - - - - | - - - - - | - - - - - | - - - - - | - - - - y g - a m f k                                                   |
| Desulf_3E39      | 53      | V I R A D - D - P R C D I L A A - - H T R - - - - - - - - - - -                                                                                                   | - - - - - | - - - - - | - - - - - | - - - - - | - - - - - | - - - - - | - - - - Y G - H I V R                                                   |
| Cace_3E10        | 47      | V L E - D - R - E N I D K L S N - - F S K - - - - - - - - - - -                                                                                                   | - - - - - | - - - - - | - - - - - | - - - - - | - - - - - | - - - - - | - - - - Y A - N S L K                                                   |
| AMINE_CaceNitB   | 47      | a v t n - k n l i s e l s t a - - - - - - - - - - - - - - - - -                                                                                                   | - - - - - | - - - - - | - - - - - | - - - - - | - - - - - | - - - - - | - - - - r k m g s q - - - - l k                                         |
| Bthet_3KWK       | 58      | V V S - D - R - A K L D S M A A - A L P - - - - - - - - - - -                                                                                                     | - - - - - | - - - - - | - - - - - | - - - - - | - - - - - | - - - - - | - - - - Y A - K M L T                                                   |
| Pging_3GE5       | 64      | V V R - E - E - E G R K R L A P - - C S - - - - - - - - - - -                                                                                                     | - - - - - | - - - - - | - - - - - | - - - - - | - - - - - | - - - - - | - - - - Q Q P W - F P                                                   |
| Cnov_3G14        | 50      | V V E - S - D - K L K L D I A N - A I E N K - - - - - - - - - - -                                                                                                 | - - - - - | - - - - - | - - - - - | - - - - - | - - - - - | - - - - - | - - - - A A S E A V L                                                   |
| Gmetal_4DN2      | 57      | C W R F V - V - - V E - D Q A T - K V Q I S E L S Y V E A Y F G P - - - - -                                                                                       | - - - - - | - - - - - | - - - - - | - - - - - | - - - - - | - - - - - | - - - -                                                                 |
| Cdiff_3GFA       | 49      | V I T - - - E - K E K E S M L K - A M S K G I Q N E I N D N G L L P G S R - Q - H I A G A N - - - - -                                                             | - - - - - | - - - - - | - - - - - | - - - - - | - - - - - | - - - - - | - - - - Y T V E I M K                                                   |
| Tther_1NOX       | 56      | V V R - D - P - A T K R A L R E - A A F G - - - - - - - - - - -                                                                                                   | - - - - - | - - - - - | - - - - - | - - - - - | - - - - - | - - - - - | - - - - Q A - H V - E                                                   |
| Cdiff_3EO8       | 50      | V I K - R - R - D L M E K I A D - V I T K K Q Q E I L V E M D K V S V D K A N R F R K F V K - - - - -                                                             | - - - - - | - - - - - | - - - - - | - - - - - | - - - - - | - - - - - | - - - - N F T L F Y L                                                   |
| Mtub_4XOM        | 58      | W L - Q T P A I - R A R L L D R M K D K W R S D L T S D G L P A D A I E R R - V A R G Q I L Y - - - - -                                                           | - - - - - | - - - - - | - - - - - | - - - - - | - - - - - | - - - - - | - - - - - D A P                                                         |
| Tmar_4EO3        | 52      | V V D E E E L - - - - - - - L K K I H E - - - - - - - - - - -                                                                                                     | - - - - - | - - - - - | - - - - - | - - - - - | - - - - - | - - - - - | - - - - G N Y W M                                                       |
| Agro_2FRE        | 59      | Y A H K D S E - - - - - - - D W P L F - - - - - - - - - - -                                                                                                       | - - - - - | - - - - - | - - - - - | - - - - - | - - - - - | - - - - - | - - - - G N Q K W A                                                     |
| Gox              | 59      | Y A R R N T P D - - - - - - - W D R F - - - - - - - - - - -                                                                                                       | - - - - - | - - - - - | - - - - - | - - - - - | - - - - - | - - - - - | - - - - N R S W A                                                       |
| Mmus_3GB5        | 103     | V V K D P D M - - - - - - - K H K I R E I I E E E E E I N Y M K R M G K R W V T D L K K L R T N W I K E Y L D - - - - -                                           | - - - - - | - - - - - | - - - - - | - - - - - | - - - - - | - - - - - | - - - -                                                                 |
| Hsap_4TTC        | 109     | V V K D P D V - - - - - - - K H K I R K I I E E E E E I N Y M K R M G H R W V T D L K K L R T N W I K E Y L D - - - - -                                           | - - - - - | - - - - - | - - - - - | - - - - - | - - - - - | - - - - - | - - - -                                                                 |
| Bfrag_3EK3       | 53      | A V C N T V K L E E L - - - - - N E R I K G A F A K S D D K H L R E R G H S E T Y C C Y Y H A - - - - -                                                           | - - - - - | - - - - - | - - - - - | - - - - - | - - - - - | - - - - - | - - - -                                                                 |
| Dhafn_3PXV       | 52      | V V K N K E L - - - - - - - M Q E M E A - - - - - - - - - - -                                                                                                     | - - - - - | - - - - - | - - - - - | - - - - - | - - - - - | - - - - - | - - - - E G L A Y L A G M E D Q S S Y N R I M E R G G R - - - - L F Y   |
| Smel_2ISJ        | 73      | L V R Q D E T - - - - - - - R E K V - - - - - - - - - - -                                                                                                         | - - - - - | - - - - - | - - - - - | - - - - - | - - - - - | - - - - - | - - - - W Q - - - A F - - - - - Q R A                                   |
| Agro_3K6H        | 59      | V Y R G E E - - - - - - - R V R L - - - - - - - - - - -                                                                                                           | - - - - - | - - - - - | - - - - - | - - - - - | - - - - - | - - - - - | - - - - S E A A L R I A L E K N P D L D L Q Q Q E A E R T - - - - R F T |



|                  | 241                                                                                                                                                                         | 251 | 261 | 271 | 281 | 291 | 301 | 311 |
|------------------|-----------------------------------------------------------------------------------------------------------------------------------------------------------------------------|-----|-----|-----|-----|-----|-----|-----|
| Consensus        | I a a q n l l l a a a a l g l g s c p i g g f d - - - a e v v r e - - - g l e - - - k l l f g i a f G y - p d - - - - n g - p k p r - p - l e e v v h f -                   |     |     |     |     |     |     |     |
| Conservation     |                                                                                                                                                                             |     |     |     |     |     |     |     |
| Cons_NsfB        | 137 I A I G N I I T A A A E I G I D S C P M E G F D - - - p e k v d e i L - - g l d e k g l r s v v m l a I G Y r d - e e - d d v - l p K v R k p - l e e v v t e i         |     |     |     |     |     |     |     |
| Ent_5J8D         | 145 L N V G N F L L G V G A M G L D A V P I E G F D - - - A A I L D E E F - - G L K E K G F T S L V V V P V G H H S V E D F N - A T L P K S R L P - L S T I V T E C         |     |     |     |     |     |     |     |
| Ecoli_1YK1       | 145 L N V G N F L L G V A A L G L D A V P I E G F D - - - A A I L D A E F - - G L K E K G Y T S L V V V P V G H H S V E D F N - A T L P K S R L P - Q N I T L T E V         |     |     |     |     |     |     |     |
| Vfisch_1VFR      | 145 L A L G N A L H T L A R L N I D S T M E G I D - - - P E L L S E I F - - A D E L K G Y E C H V A L A I G Y H H P S E D Y N A S L P K S R K A - F E D V I T I L           |     |     |     |     |     |     |     |
| Helicobac_3QDL   | 142 I A V G Q I C M G V S L M G L D S C I I G G F D - - - P L K V G E V L - - E E R I N K P K I A C L I A L G K - - - R V A E A S Q - K S R K S - K V D A I T W L           |     |     |     |     |     |     |     |
| Idiomar_3OF4     | 137 I G L G T F L L A A A E L E V D S C P M E G I E - - - H D A Y D N I L - - S L K D L G L S T V F A C P V G Y R S E A D T T - Q F Q K K V R Q P - L S R F K V V L         |     |     |     |     |     |     |     |
| AMINE_Styph_3HZN | 148 L N V G N F L L G V A A M G L D A V P I E G F D - - - A E V L D A E F - - G L K E K G Y T S L V V V P V G H H S V E D F N - A G L P K S R L P - L E T T L T E V         |     |     |     |     |     |     |     |
| Spyo_2HAY        | 150 I A L G N M M M T A A L L G I D T C P I E G F H - - - Y D K V N H I L A K H N V I D L E K E G I A S M L S L - - G Y R L R D P K H A Q V R K P - K E E V M S V V         |     |     |     |     |     |     |     |
| Bsubt_3BEM       | 137 L S A M M F M L S A A A G W D T C P M I G F D A E - - - - A V K R - I - L N I D D Q F E V M M I T I G K E K T E S - - - R R P R G Y R K P V N E F V E Y M -             |     |     |     |     |     |     |     |
| Lplant_4QLX      | 150 V V G M Q L L L V A R A H G Y D A N A F S G I D F E - - - - K M I P - T L G L D P K R Y V P V M G I A I G K - - - A A Q E P L H T T R Y D A K T Q T D F L A - - -       |     |     |     |     |     |     |     |
| Sepider_3GBH     | 145 L M A M Q L M L T A K A H G Y D T N P I G G F D K E - - - - N I A D - I I G Y D S D R Y V P V L A I A I G K - - - K A Q - - - D A H D S V R L P I D D V R E F L -       |     |     |     |     |     |     |     |
| Esibir_3GE6      | 144 L V S M Q L M L V A R A H G Y D T N P I G G Y E K D - - - - Q I A E A F G M E K D R Y V P M L L S I G K - - - A V D - - - A G Y P S V R L P I N D I A D W K -           |     |     |     |     |     |     |     |
| AMINE_Bcer3024   | 144 L V A M Q F M L A A R A H G Y D T C P I G G F E K D - - - - Q I A E A F G L D K E S Y V P V M L I S I G K - - - A A D - - - S G Y Q S V R L P I E K V A E W K -         |     |     |     |     |     |     |     |
| Smutants_3GAG    | 138 L F A M N L M Q V V R V Y G Y D S V P M R G V D F D - - - - - A I K T Y L D M P N G W E P I L M L P V G K - - - - A L Q - A G N P H V R K S V A E F A E I E             |     |     |     |     |     |     |     |
| Spneum_2B67      | 137 L V A M N L V L A L T D Q G I G S N I L G F D K S - - - K V N - E - V L E I E D R - F R P E L L I T V G Y - T D E - K L E - P S Y - - R L P V D E I I E K R -           |     |     |     |     |     |     |     |
| Cons_NfsA        | 113 I a a Q n a v v a A e s I G L G i v y i G g i r n - n p e e v a e l l e L P e y - - - v f P v f G l c v G y P d q - - - e p a - v K P R L P - l e a v l h e e           |     |     |     |     |     |     |     |
| Ecoli_1F5V       | 110 M M A Q N A L V I A A E S L G L G G V Y I G G I R N - N I E A V T K L L K L P Q H - - - V L P L F G L C L G W P A D - - - N P D - L K P R L P - A S I L V H E N         |     |     |     |     |     |     |     |
| Vharv_2BKJ       | 110 I M A Q N C L L A A E S M G L G G V Y I G G L R N S A A Q - V D E L L G L P E N - - - S A V L F G M C L G H P D Q - - - N P E - V K P R L P - A H V V V H E N           |     |     |     |     |     |     |     |
| AMINE_Bsubt_3N2S | 116 L A A Q N M S I A A E S M G L G I C Y I G G I R N - E L D K V T E V L Q T P D H - - - V L P L F G L A V G H P A N L - - - S G - K K P R L P - K Q A V Y H E N           |     |     |     |     |     |     |     |
| Bfrag_3EOF       | 112 L V A Q T F C T L A E E A G L G I C Y L G T T Y - N P Q M I D A L H L P E L - - - V F P I T V T V G Y P A E - - - - S P K Q V D R L P - I E G I I H E E                 |     |     |     |     |     |     |     |
| AMINE_Gox0834    | 141 I A A Q N A V T A F E S L G L G T V Y I G G L R N - H P E E V S L L S L P P R - - - S V A V V G L C V G K P D P A A - - - Q N G - Y K P R L G - Q D V L H R E           |     |     |     |     |     |     |     |
| AMINE_Bcer1619   | 113 L F A Q N L A L A A E S L G Y G I C Y I G G I R N - N P R E V S E L L H L P D K - - - V Y P V F G M T V G V P D E - - - D H G - V K P R L P - V A A V L H E N           |     |     |     |     |     |     |     |
| AMINE_CaceNitA   | 115 I A L G A S V V A A E S L G L G T V P I G G I R K - N P E E V I E I L G L P K Y - - - T F P M V G L V V G Y P A D - - - E S H - K K P R V P - F E S F R H N E           |     |     |     |     |     |     |     |
| Cons_PnbA        | 145 m f l q n f m l a a r a r G l g t c p Q a a l a m - - y s p v v r e h l g i p d d r - - m i v c g i s I G y - a D p d a p a n s f r t e R a p - v e e f v t f v         |     |     |     |     |     |     |     |
| AMINE_Msmg_2WZW  | 161 I Y A Q T L M L A M T A H G I A S C P Q A L L S F - - Y A D T V R A E L G V - E N R - - K L L M G I S F G Y - A D D T A A V N G V R I P R A G - L S E T T R F S         |     |     |     |     |     |     |     |
| Bhen_3GR3        | 153 M F M Q T I M L A A R G F G L D T C A Q A A F A D - - Y H K Q I R S L L S V P S D R - - H I I C G M A L G Y - R D M N A P E N N F E T E R E P - I D N F V H F I         |     |     |     |     |     |     |     |
| Strep            | 150 M Y A Q N F L L S L T A R G F H G I P Q A V L G V - - Y A D T V R A S L G V R D D L - - K L L F G I S F G I - G D K T S P M Y D I G M G R I P - L Q Q S V V L H         |     |     |     |     |     |     |     |
| Saur             | 152 M Y A Q T L L L A L N A Y G V A S C P Q A L M S F - - F A D T V R E T L G L T G G - - - K L L F G I A F G Y - A D P A A A V N T V A V G R E P - L R E T T R F H         |     |     |     |     |     |     |     |
| Coryn            | 145 T Y A E N F L L S L T A H G Y H G V P Q G M I S L - - L A P T V R E F L G V D E E Y - - K L V T A L T F G R - A D E S S P V Y K T A P G R V A - L S E T V T V H         |     |     |     |     |     |     |     |
| Nocar            | 159 M Y G Q T L L L A M T A Y G I A S C P Q G L G F - - Y G E T I R H Q L G I T D G - - - K V L F G V S F G Y - A N T S A A V N R I R V A R A K - L C E T T R F H           |     |     |     |     |     |     |     |
| Kpneu            | 151 M Y A Q T L L L S L T A H G L G G V P Q T S L G F - - Y G E T I R K E L G V D P S L - - K L L F G I S L G Y - P D I T H P A N Q Y R I N K V S - L G E S V T F H         |     |     |     |     |     |     |     |
| Dicke            | 163 M Y G Q T F L L S L A A H G L G G I P Q T S L G F - - F A D P I R H F L G I P D N L - - K L L F G I S F G Y - P D E A A P G N R L R M D R V N - I S D S V T F H         |     |     |     |     |     |     |     |
| Halio            | 150 M Y A Q T L M L A M A A N G L G S C P Q T A L S F - - Q A D L V R E V L E I D A S N - - K L M F G I S F G H - P D P A P V N R C V T D R A L - L S D T V H F H           |     |     |     |     |     |     |     |
| Rhodo            | 147 G Y A Q T L M L A M A S R G I G S C A Q G A L S L - - Y P E I V R A H L G L V Q G P - - R L I M G I A F G Y - K D P D H P A N A A H T D R A A - L A D I V H H H         |     |     |     |     |     |     |     |
| Sphin            | 158 M Y A Q S F M L A L T A N G L A S C A Q G A L S H - - H A E I V H R E L G V G E D Q - - K L L F G I A F G Y - - - E D A A H P A N A A R T V - R D K D H V L H           |     |     |     |     |     |     |     |
| Actino           | 148 M L A Q N F M L S L T A H G F G S V P Q I A L T Y - - S P D V V R Q E F N V P D N Y - - K L V L G I S F G R - P K P N S T A N S Y I Q P R A P - L S E T V V F H         |     |     |     |     |     |     |     |
| Cons_Frm2        | 129 m l q f a v w t a l e e e G I G A s L Q H Y N P I I d e a v a k e - - - w n i P a s w k L r A Q m p F G s i e a p - p - g e K e f q p - - - l e e R v k v f             |     |     |     |     |     |     |     |
| Smut_2IFA        | 129 I A L Y A I W L A L A E Q N I G M S V Q H Y N P L V D A Q V A E K - - - Y D L P T N W K M R A Q I P F G S - I E A - P A G E K E F M A - - - D Q E R F K V F             |     |     |     |     |     |     |     |
| Scere_4URP       | 127 A V Q I Q S W T A L E L L G L G A N L Q H Y N D Y V K S A L P - Q - - - D V P I A W T V Q S Q L V F G - - - V - P T A L P E E K - - - T F I N N V I N V                 |     |     |     |     |     |     |     |
| Llact_2WQF       | 132 I I S V N V W T A L A E L G L G A N L Q H Y N P L I D E A V A K E - - - W N L P E S W K L R G Q L V F G S - I E A - P A G E K T F M D - - - D A D R F I V A             |     |     |     |     |     |     |     |
| Bcer_1YWQ        | 131 M L Q H T V W M L L S A E G I G A S L Q H Y N P I V D A E V K E T - - - W N I P A E W S L V G Q M P F G E - P N E Q P A - E R T F L P - - - T E D V V K Y F             |     |     |     |     |     |     |     |
| Cons_HUB         | 93 I a a e n m l l a a t e I G L G s c w v g i f - - d e - e k v r e l l - g l P - e n l e p v a l i p I g y - p a - - - e e p k p p d r k - p - l e e i v y n -            |     |     |     |     |     |     |     |
| Desulf_3E39      | 102 A A V Q N M L L A A H A L Q L G A V W L - - G E I N Q A A T L L P A L - A L D P A R L S F E A I A A G H - P A - - - Q N G S S - R R - P - L A E L L L E E               |     |     |     |     |     |     |     |
| Cace_3E10        | 95 A A A E N I L L E A A Y L D L G A V W L G A Q P I E E R V K N L K E M F - N L K - S N I K P F C V I S V G Y - P E - - N S E N K F I D R F - D - A K R I H I E K          |     |     |     |     |     |     |     |
| AMINE_CaceNitB   | 93 I a s t l i q v t a h s m g l g s c w - - - - - c h v r n r d r i - d y d t t - e a f i k t l i l n i - p e n l k v e c m l g i g y - p d e e r k a y t d                |     |     |     |     |     |     |     |
| Bthet_3KWK       | 103 A A A Q N I L L A A E S M G L G A V W T A A Y P Y E D R M E V V R K Y T - H L P E N - I L P L C V I P F G Y - P A - - - T K E Q P K Q K Y - D - E K K I H Y N Q         |     |     |     |     |     |     |     |
| Pging_3GE5       | 114 I A M T Y M M L E A H S L G L G C T W V C A F - - - D Q A L C S E I F - D I P S H - M T P V S I L A L G Y - G D P T V P P R E A F N R K - T - I E E V V S F E           |     |     |     |     |     |     |     |
| Cnov_3G14        | 106 I A M E H I V L G A T D E G Y G T C W I A A F - - - - N E N K I K E A L - K I P D N - L R V V A L T P L G V - P K D S A E D E P H H P K K - D - M D E Y L Y I D         |     |     |     |     |     |     |     |
| Gmetat_4DN2      | 115 L R G Q Q Y Y L T - - D V G I A A Q N L M L A A H D L G L G - - - S V F V G V F - D E - - Q Q L G E L L G I - P A E - - L R I V G L F P L - G - Y P L - - E G P         |     |     |     |     |     |     |     |
| Cdiff_3GFA       | 131 A A I Q N M S L T A V E L G L G S L W I C D V - Y - L F A Y R E L C E W L - N T - - D - S Q L V A A I S L G Y - P D - - - E E P S R R P R L - Q - L S D V T E W R       |     |     |     |     |     |     |     |
| Tther_1NOX       | 138 I L L G Y L L L L L E A Y G L G S V P M - - - - L G F D P E R V R A I L - G L P S R - A A I P A L V A L G Y - P A - - - E E G Y P S H R L - P - L E R V L W R           |     |     |     |     |     |     |     |
| Cdiff_3EO8       | 145 A I E N F T L S A I E L G Y G S C W L T S Q N Y A A D E I E A V L E A E T G F E K G E Y F L G A M L A L G V - P E - - - D N L K S P S K K - P - V E E I C T F I         |     |     |     |     |     |     |     |
| Mtub_4XOM        | 138 A A V Q A L L V A L A V R G L G S C W I G S T I F A A D L V R D E L D L P V - - - - D W E P L G A I A I G Y A D E P S G L - - R D P V P A A - - - - D L L I L K         |     |     |     |     |     |     |     |
| Tmar_4EO3        | 100 L F D T G L A V - - - - G N L L V Q A T Q M - - - - - - - - - - - - - - - - - - - - - - - - - - - - - - - - - - - - - - - - - - - - - - - - - - - - - - - -             |     |     |     |     |     |     |     |
| Agro_2FRE        | 121 L A M Q A H L L G Y H A H G M G G I F K D - - - - - - - - - - - - - - - - - - - - - - - - - - - - - - - - - - - - - - - - - - - - - - - - - - - - - - - -               |     |     |     |     |     |     |     |
| Gox              | 120 V L I Q I - - - Q A S Q A G W A V H P I S G - - - - - F D R D L A H A G L E F P E D Y Q V H A A L V I G R Q G D A G A L S E E L R R E R E Q P S G - - - - - R F         |     |     |     |     |     |     |     |
| Mmus_3GB5        | 185 C G L L L A A L Q N A G L V T V T T T P L N C G P - - - R L R V - L - - - L G R P S H E K L L V L L P V G Y - P S R - - - - - D A - T V P D L K R K A L - - - -         |     |     |     |     |     |     |     |
| Hsap_4TTC        | 191 C G I L L A A L Q N A G L V T V T T T P L N C G P - - - R L R V - L - - - L G R P A H E K L L M L P V G Y - P S K - - - - - E A - T V P D L K R K P L - - - -           |     |     |     |     |     |     |     |
| Bfrag_3EK3       | 122 L A A - - - - T S L G I A S C W I N Q L G T T C D D P E V R A Y L T S - L G V P E N H K V Y G C V A L G Y - - - - - - - - - - - - - - - - - - - - - - - - -             |     |     |     |     |     |     |     |
| Dhafn_3PXV       | 122 L A A - - - - T S L G I A S C W I N Q L G T T C D D P E V R A Y L T S - L G V P E N H K V Y G C V A L G Y - - - - - - - - - - - - - - - - - - - - - - - - -             |     |     |     |     |     |     |     |
| Smel_2ISJ        | 149 V C A V Q N L W L A R A E G V G V G W V - - - - S I F H E S E I K A I L - - G I P D H V E I V A W L C L G F - - - V D - - - - R L Y Q E P E L A A K G W R Q R           |     |     |     |     |     |     |     |
| Agro_3K6H        | 125 A V C L N V I F A A N A S G F A A N W L T E W L A F D P A - - - - F L A E I G V - - - - S A E - E K V A G Y I H I G S - - - - - - - - - - - - - - - - - - - - - - - - - |     |     |     |     |     |     |     |



321 331 341 351 361 371 381 391

| Consensus        | 321                                                                                                                                               | 331 | 341 | 351 | 361 | 371 | 381 | 391 |
|------------------|---------------------------------------------------------------------------------------------------------------------------------------------------|-----|-----|-----|-----|-----|-----|-----|
| Conservation     | -                                                                                                                                                 | -   | -   | -   | -   | -   | -   | -   |
| Cons_NsfB        | 207                                                                                                                                               | -   | -   | -   | -   | -   | -   | -   |
| Erit_5J8D        | 217                                                                                                                                               | -   | -   | -   | -   | -   | -   | -   |
| Ecoli_1YK1       | 217                                                                                                                                               | -   | -   | -   | -   | -   | -   | -   |
| Vfisch_1VFR      | 218                                                                                                                                               | -   | -   | -   | -   | -   | -   | -   |
| Helicobac_3QDL   | 210                                                                                                                                               | -   | -   | -   | -   | -   | -   | -   |
| Idiomar_3OF4     | 209                                                                                                                                               | -   | -   | -   | -   | -   | -   | -   |
| AMINE_Styph_3HZN | 220                                                                                                                                               | -   | -   | -   | -   | -   | -   | -   |
| Spyo_2HAY        | 224 K                                                                                                                                             | -   | -   | -   | -   | -   | -   | -   |
| Bsubt_3BEM       | 206                                                                                                                                               | -   | -   | -   | -   | -   | -   | -   |
| Lplant_4QLX      | 219                                                                                                                                               | -   | -   | -   | -   | -   | -   | -   |
| Sepider_3GBH     | 213                                                                                                                                               | -   | -   | -   | -   | -   | -   | -   |
| Esibir_3GE6      | 212                                                                                                                                               | -   | -   | -   | -   | -   | -   | -   |
| AMINE_Bcer3024   | 212                                                                                                                                               | -   | -   | -   | -   | -   | -   | -   |
| Smutants_3GAG    | 206                                                                                                                                               | -   | -   | -   | -   | -   | -   | -   |
| Spneum_2B67      | 204                                                                                                                                               | -   | -   | -   | -   | -   | -   | -   |
| Cons_NfsA        | 183 t Y - - - t d e - - - e a l a a Y d e t l s e y y q e r t s n q r - - t t w s e q i a a r l s k e g r - - - p h i l l e f l k k q G f l l r   |     |     |     |     |     |     |     |
| Ecoli_1F5V       | 180 S Y Q P L D - - - - K G A L A Q Y D E Q L A E Y Y L T R G S N N R R - D T W S D H I R R T I I K E S R - - - P F I L D Y L H K Q G W A T R     |     |     |     |     |     |     |     |
| Vharv_2BKJ       | 180 Q Y Q E L N - - - - L D D I Q S Y - Q T M Q A Y Y A S R T S N Q K L - S T W S Q E V T G K L A G E S R S K - - G L A K R - - - - - - -         |     |     |     |     |     |     |     |
| AMINE_Bsubt_3N2S | 186 T Y N V N T D D - F - R H T M N T Y D K T I S D Y Y R E R T N G K R E - E T W S D Q I L N F M K Q K P R - - - T Y L N D Y V K E K G F N K N   |     |     |     |     |     |     |     |
| Bfrag_3EOF       | 182 S Y H D Y T A E D I N R L Y A Y K E S L P E N K L F I E E N Q K E T L P Q V F T - D V R Y T K K D N - E F M S E N L L K - V L R R Q G F M D - |     |     |     |     |     |     |     |
| AMINE_Gox0834    | 213 R Y - - S T E N E A - K G I A A Y - D R I A D D Y K E Q G L T S R V - - - W S E T V A K R V D S F K G L S G R H V I R T V L H R L G F P L R   |     |     |     |     |     |     |     |
| AMINE_Bcer1619   | 183 G Y D E Q K Y D E - - - L L N E Y D E T M N A Y Y K E R S S N K K N - V T W T E S M S S F M S K E - K R - - - M H M K E F L S E K G L N K K   |     |     |     |     |     |     |     |
| AMINE_CaceNitA   | 185 S Y D I K A V E D - - - S I N V Y E Q - M N K Y L K E I G R A E K E - I N W - S T F T S T I Y Q - - - - S V Y Y K Q G L K T K - - - - -       |     |     |     |     |     |     |     |
| Cons_PnbA        | 219 g - - - - - - - - - - - - - - - - - - - - - - - - - - - - - - - - - - - - - - - - - - - - - - - - - - - - - - - - - - - - -                   |     |     |     |     |     |     |     |
| AMINE_Msmg_2WZW  | 234 R - - - - - - - - - - - - - - - - - - - - - - - - - - - - - - - - - - - - - - - - - - - - - - - - - - - - - - - - - - - - -                   |     |     |     |     |     |     |     |
| Bhen_3GR3        | 227 K S Y P - - - - - - - - - - - - - - - - - - - - - - - - - - - - - - - - - - - - - - - - - - - - - - - - - - - - - - - - - - - - -             |     |     |     |     |     |     |     |
| Strep            | 224 D T P G V L D E Q - - - - - - - - - - - - - - - - - - - - - - - - - - - - - - - - - - - - - - - - - - - - - - - - - - - - - - - - - - - - -   |     |     |     |     |     |     |     |
| Saur             | 225 R - - - - - - - - - - - - - - - - - - - - - - - - - - - - - - - - - - - - - - - - - - - - - - - - - - - - - - - - - - - - -                   |     |     |     |     |     |     |     |
| Coryn            | 219 G I E G L G L - - - - - - - - - - - - - - - - - - - - - - - - - - - - - - - - - - - - - - - - - - - - - - - - - - - - - - - - - - - - -       |     |     |     |     |     |     |     |
| Nocar            | 232 T - - - - - - - - - - - - - - - - - - - - - - - - - - - - - - - - - - - - - - - - - - - - - - - - - - - - - - - - - - - - -                   |     |     |     |     |     |     |     |
| Kpneu            | 225 Q - - - - - - - - - - - - - - - - - - - - - - - - - - - - - - - - - - - - - - - - - - - - - - - - - - - - - - - - - - - - -                   |     |     |     |     |     |     |     |
| Dicke            | 237 N - - - - - - - - - - - - - - - - - - - - - - - - - - - - - - - - - - - - - - - - - - - - - - - - - - - - - - - - - - - - -                   |     |     |     |     |     |     |     |
| Halio            | 224 D - - - - - - - - - - - - - - - - - - - - - - - - - - - - - - - - - - - - - - - - - - - - - - - - - - - - - - - - - - - - -                   |     |     |     |     |     |     |     |
| Rhodo            | 221 G D T - - - - - - - - - - - - - - - - - - - - - - - - - - - - - - - - - - - - - - - - - - - - - - - - - - - - - - - - - - - - -               |     |     |     |     |     |     |     |
| Sphin            | 229 G - - - - - - - - - - - - - - - - - - - - - - - - - - - - - - - - - - - - - - - - - - - - - - - - - - - - - - - - - - - - -                   |     |     |     |     |     |     |     |
| Actino           | 222 E - - - - - - - - - - - - - - - - - - - - - - - - - - - - - - - - - - - - - - - - - - - - - - - - - - - - - - - - - - - - -                   |     |     |     |     |     |     |     |
| Cons_Frm2        | 199 k - - - - - - - - - - - - - - - - - - - - - - - - - - - - - - - - - - - - - - - - - - - - - - - - - - - - - - - - - - - - -                   |     |     |     |     |     |     |     |
| Smut_2IFA        | 199 G D L E - - - - - - - - - - - - - - - - - - - - - - - - - - - - - - - - - - - - - - - - - - - - - - - - - - - - - - - - - - - - -             |     |     |     |     |     |     |     |
| Scere_4URP       | 192 Y H - - - - - - - - - - - - - - - - - - - - - - - - - - - - - - - - - - - - - - - - - - - - - - - - - - - - - - - - - - - - -                 |     |     |     |     |     |     |     |
| Llact_2WQF       | 202 K - - - - - - - - - - - - - - - - - - - - - - - - - - - - - - - - - - - - - - - - - - - - - - - - - - - - - - - - - - - - -                   |     |     |     |     |     |     |     |
| Bcer_1YWQ        | 200 - - - - - - - - - - - - - - - - - - - - - - - - - - - - - - - - - - - - - - - - - - - - - - - - - - - - - - - - - - - - -                     |     |     |     |     |     |     |     |
| Cons_HUB         | 159 - - - - - - - - - - - - - - - - - - - - - - - - - - - - - - - - - - - - - - - - - - - - - - - - - - - - - - - - - - - - -                     |     |     |     |     |     |     |     |
| Desulf_3E39      | 172 P F P Q P E - - - - - - - - - - - - - - - - - - - - - - - - - - - - - - - - - - - - - - - - - - - - - - - - - - - - - - - - - - - - -         |     |     |     |     |     |     |     |
| Cace_3E10        | 168 Y - - - - - - - - - - - - - - - - - - - - - - - - - - - - - - - - - - - - - - - - - - - - - - - - - - - - - - - - - - - - -                   |     |     |     |     |     |     |     |
| AMINE_CaceNitB   | 160 e d l a l n k l h y d - k y s k - - - - - - - - - - - - - - - - - - - - - - - - - - - - - - - - - - - - - - - - - - - - - - - - -             |     |     |     |     |     |     |     |
| Bthet_3KWK       | 175 Y - - - - - - - - - - - - - - - - - - - - - - - - - - - - - - - - - - - - - - - - - - - - - - - - - - - - - - - - - - - - -                   |     |     |     |     |     |     |     |
| Pging_3GE5       | 185 K L - - - - - - - - - - - - - - - - - - - - - - - - - - - - - - - - - - - - - - - - - - - - - - - - - - - - - - - - - - - - -                 |     |     |     |     |     |     |     |
| Cnov_3G14        | 177 K W G T S F M E S N V K I L E K N - - - - - - - - - - - - - - - - - - - - - - - - - - - - - - - - - - - - - - - - - - - - - - - - -           |     |     |     |     |     |     |     |
| Gmetal_4DN2      | 180 K A G P S R K P L D E I V H Y G K Y Q A - - - - - - - - - - - - - - - - - - - - - - - - - - - - - - - - - - - - - - - - - - - - - - - - -     |     |     |     |     |     |     |     |
| Cdiff_3GFA       | 198 - - - - - - - - - - - - - - - - - - - - - - - - - - - - - - - - - - - - - - - - - - - - - - - - - - - - - - - - - - - - -                     |     |     |     |     |     |     |     |
| Tther_1NOX       | 205 - - - - - - - - - - - - - - - - - - - - - - - - - - - - - - - - - - - - - - - - - - - - - - - - - - - - - - - - - - - - -                     |     |     |     |     |     |     |     |
| Cdiff_3EO8       | 219 K - - - - - - - - - - - - - - - - - - - - - - - - - - - - - - - - - - - - - - - - - - - - - - - - - - - - - - - - - - - - -                   |     |     |     |     |     |     |     |
| Mtub_4XOM        | 207 - - - - - - - - - - - - - - - - - - - - - - - - - - - - - - - - - - - - - - - - - - - - - - - - - - - - - - - - - - - - -                     |     |     |     |     |     |     |     |
| Tmar_4EO3        | 147 L I A V G Y L G D E S E L S E K H R E L E R S E R V R K E L S E I V R W N L - - - - - - - - - - - - - - - - - - - - - - - - - - - - - -       |     |     |     |     |     |     |     |
| Agro_2FRE        | 179 V P S K R V P L A D V A F E G R F T G K A D - - - - - - - - - - - - - - - - - - - - - - - - - - - - - - - - - - - - - - - - - - - - - - - - - |     |     |     |     |     |     |     |
| Gox              | 186 P L A - E I A F E G R F R S N E - - - - - - - - - - - - - - - - - - - - - - - - - - - - - - - - - - - - - - - - - - - - - - - - -             |     |     |     |     |     |     |     |
| Mmus_3GB5        | 247 - D Q I M V T V - - - - - - - - - - - - - - - - - - - - - - - - - - - - - - - - - - - - - - - - - - - - - - - - - - - - - - - - - - - - -     |     |     |     |     |     |     |     |
| Hsap_4TTC        | 253 - D Q I M V T V - - - - - - - - - - - - - - - - - - - - - - - - - - - - - - - - - - - - - - - - - - - - - - - - - - - - - - - - - - - - -     |     |     |     |     |     |     |     |
| Bfrag_3EK3       | 179 K T V K - - - - A G T I T I V E - - - - - - - - - - - - - - - - - - - - - - - - - - - - - - - - - - - - - - - - - - - - - - - - -             |     |     |     |     |     |     |     |
| Dhafn_3PXV       | 171 - - - - A - N T T K P P H V P D - - - - K D K I T Y V E - - - - - - - - - - - - - - - - - - - - - - - - - - - - - -                           |     |     |     |     |     |     |     |
| Smel_2ISJ        | 216 L - - - - - - - - - - - P L E D L V F E E G W G V R - - - - - - - - - - - - - - - - - - - - - - - - - - - - - -                               |     |     |     |     |     |     |     |
| Agro_3K6H        | 185 P - - - - - - - - - - - E L A D V V T W V G D V - - - - - - - - - - - - - - - - - - - - - - - - - - - - - -                                   |     |     |     |     |     |     |     |

197

198 **4. References**

- 199 1. Phillips, K. L.; Sandler, S. I.; Chiu, P. C., A method to calculate the one-electron  
200 reduction potentials for nitroaromatic compounds based on gas-phase quantum  
201 mechanics. *J. Comput. Chem.* **2011**, *32*, (2), 226-239.
- 202 2. Salter-Blanc, A. J.; Bylaska, E. J.; Johnston, H. J.; Tratnyek, P. G., Predicting  
203 reduction rates of energetic nitroaromatic compounds using calculated one-electron  
204 reduction potentials. *Environ. Sci. Technol.* **2015**, *49*, 3778-3786.
- 205 3. La-Scalea, M. A.; Menezes, C. M. S.; Juliao, M. S. S.; Chung, M. C.; Serrano, S. H.  
206 P.; Ferreira, E. I., Voltammetric Behavior of Nitrofurazone and its Hydroxymethyl  
207 Prodrug with Potential Anti-Chagas Activity. *J. Braz. Chem. Soc.* **2005**, *16*, (4),  
208 774-782.
- 209 4. Hansch, C.; Leo, A.; Taft, R. W., A survey of Hammett substituent constants and  
210 resonance and field parameters. *Chem. Rev.* **1991**, *91*, (2), 165–195.
- 211 5. Pettersen, E. F.; Goddard, T. D.; Huang, C. C.; Couch, G. S.; Greenblatt, D. M.;  
212 Meng, E. C.; Ferrin, T. E., UCSF Chimera - a visualization system for exploratory  
213 research and analysis. *J. Comput. Chem.* **2004**, *25*, (13), 1605-1612.
- 214 6. Gwenin, V. V.; Poornima, P.; Halliwell, J.; Ball, P.; Robinson, G.; Gwenin, C. D.,  
215 Identification of novel nitroreductases from *Bacillus cereus* and their interaction  
216 with th CB1954 prodrug. *Biochem. Pharmacol.* **2015**, *98*, 392-402.
- 217 7. Chaignon, P.; Cortial, S.; Ventura, A. P.; Lopes, P.; Halgand, F.; Laprevote, O.;  
218 Ouazzani, J., Purification and identification of a *Bacillus* nitroreductase: Potential  
219 use in 3,5-DNBTF biosensing system. *Enz. Microb. Technol.* **2006**, *39*,  
220 1499-1506.
- 221 8. Yang, Y.; Lin, J.; Wei, D., Heterologous overexpression and biochemical  
222 characterization of a nitroreductase from *Gluconobacter oxydans* 621H. *Mol.*  
223 *Biotechnol.* **2016**, *58*, 428-440.
- 224 9. Kutty, R.; Bennett, G. N., Biochemical characterization of trinitrotoluene  
225 transforming oxygen-insensitive nitroreductases from *Clostridium acetobutylicum*  
226 ATCC 824. *Arch Microbiol* **2005**, *184*, 158-167.
- 227 10. Manina, G.; Bellinzoni, M.; Pasca, M. R.; Neres, J.; Milano, A.; Ribeiro, A. L. J. L.;  
228 Buroni, S.; Skovierova, H.; Dianiskova, P.; Mikusova, K.; Marak, J.; Makarov, V.;  
229 Giganti, D.; Haouz, A.; Lucarelli, A. P.; Degliacomini, G.; Piazza, A.; Chiarelli, L.  
230 R.; De Rossi, E.; Salina, E.; Cole, S. T.; Alzari, P. M.; G., R., Biological and  
231 structural characterization of the *Mycobacterium smegmatis* nitroreductase NfnB,  
232 and its role in benzothiozine resistance. *Mol. Microbiol.* **2010**, *77*, (5), 1172-1185.
- 233 11. Akiva, E.; Copp, J. N.; Tokuriki, N.; Babbitt, P. C., Evolutionary and molecular  
234 foundations of multiple contemporary functions of the nitroreductase superfamily.  
235 *Proc Natl Acad Sci U S A* **2017**, *114*, (45), E9549–E9558.
- 236 12. Akiva, E.; Brown, S.; Almonacid, D. E.; Barber, A. E.; Custer, A. F.; Hicks, M. A.;  
237 Huang, C. C.; Lauck, F.; Mashiyama, S. T.; Meng, E. C.; Mischel, D.; Morris, J. H.;  
238 Ojha, S.; Schnoes, A. M.; Stryke, D.; Yunes, J. M.; Ferrin, T. E.; Holliday, G. L.;

- 239 Babbitt, P. C., The Structure-Function Linkage Database. *Nucl. Acids Res.* **2014**, *42*,  
240 D521-D530.
- 241 13. Zubatyuk, R. I.; Gorb, L.; Shishkin, O. V.; Qasim, M.; Leszczynski, J., Exploration  
242 of density functional methods for one-electron reduction potential of nitrobenzenes.  
243 *J. Comput. Chem.* **2-1-**, *31*, 144-150.

244

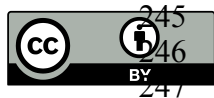

© 2017 by the authors. Submitted for possible open access publication under the terms and conditions of the Creative Commons Attribution (CC-BY) license (<http://creativecommons.org/licenses/by/4.0/>).

248
